# Supplementary material for: Ch25h/25HC axis orchestrates phagocytosis and lipid metabolism after intracerebral haemorrhage
Source: Research Square preprint supplement (doi:10.21203/rs.3.rs-8845215/v1), 2026-02-20
Supplement: Supplementary file 1 [file 908d5ead6556905a96833138.xlsx]

## Sheet: Sheet1
Table S1. Ch25h upregulation in coarse microglia, macrophage and endothelial cell types in response to ICH
Table S2. Top 10 differentially upregulated genes (by fold change) in inflammatory microglia cluster in response to ICH
Table S3. Ch25h fold change in microglial, macrophage and monocyte clusters in response to ICH
Table S4. Significantly enriched KEGG pathways in over-representation analysis of upregulated genes (FDR<0.05, Log2(FC)>1) in inflammatory microglia in response to ICH
Table S5. Significantly enriched KEGG pathways in over-representation analysis of upregulated genes (FDR<0.05, Log2(FC)>1) in homeostatic microglia in response to ICH
Table S6. Significantly enriched KEGG pathways in Gene set enrichment analysis in inflammatory microglia in response to ICH
Table S7. Number of differentially expressed genes (FDR<0.05) in microglia, macrophages and monocytes clusters for each ICH comparison
Table S8. Differentially expressed genes (FDR<0.05) in opposite directions by 25HC and red blood cell phagocytosis in BMDMs.
Table S9. Gene Ontology Biological Process terms enriched by over-representation analysis of genes downregulated by 25HC and upregulated by red blood cell phagocytosis in BMDMs
Table S10. KEGG pathways enriched by over-representation analysis of genes downregulated by 25HC and upregulated by red blood cell phagocytosis in BMDMs.
Table S11. Genes exhibiting a differential response to red blood cell phagocytosis in the presence of 25HC pre-treatment in BMDMs (interaction model).
Table S12. Gene Ontology Biological Process terms enriched by over-representation analysis among genes exhibiting a differential response to red blood cell phagocytosis in the presence of 25HC.
Table S13. Sequence of qPCR primers

## Sheet: S1
Table S1. Ch25h upregulation in coarse microglia, macrophage and endothelial cell types in response to ICH
Coarse cell type	baseMean	Log2(FC)	lfcSE	pvalue	padj
Microglia	23.9556	6.05754	1.09578	1.14673e-12	1.18603e-10
Macrophage	0.625228	0.0869995	0.289017	0.0717959	NA
Endothelial cells	12.7492	-0.303896	0.369673	0.0415536	0.208178

## Sheet: S2
Table S2. Top 10 differentially upregulated genes (by fold change) in inflammatory microglia cluster in response to ICH
Symbol	baseMean	Log2(FC)	lfcSE	pvalue	padj
Cd5l	40.5654	7.36818	2.43122	5.67927e-09	1.153e-06
Ch25h	28.6564	6.91109	2.39724	8.0845e-09	1.55178e-06
Hist1h2ae	23.2764	5.94439	2.25253	5.56857e-07	6.06056e-05
Ankle1	26.4587	5.92158	2.26411	8.18837e-07	8.07893e-05
Kif11	24.8078	5.65615	2.23789	2.30896e-06	0.000183276
Ulbp1	23.6681	5.59199	2.21782	2.28576e-06	0.000182809
Neil3	21.6466	5.58162	2.21711	2.23442e-06	0.000181452
Brip1	22.4701	5.44956	2.1959	3.10496e-06	0.000234136
Irf7	17.491	5.44302	2.37324	3.39704e-05	0.00160819
Ncapg	17.7054	5.20526	2.19218	9.71233e-06	0.000610316

## Sheet: S3
Table S3. Ch25h fold change in microglial, macrophage and monocyte clusters in response to ICH
Cell type	baseMean	Log2(FC)	lfcSE	pvalue	padj
Homeostatic Mgl	6.17503	0.136679	0.335147	0.00119301	0.025892
Inflammatory Mgl	28.6564	6.91109	2.39724	8.0845e-09	1.55178e-06
Disease-associated Mgl	NA	NA	NA	NA	NA
Border-associated Mac	0.401261	0.00701772	0.167158	0.443407	NA
Inflammatory Mac	1.39495	0.0221458	0.347837	0.791391	NA
C1q(lo) Mac	NA	NA	NA	NA	NA
Transitioning Mac	NA	NA	NA	NA	NA
Monocyte	0.129085	0.00361744	0.34167	0.627289	NA

## Sheet: S4
Table S4. Significantly enriched KEGG pathways in over-representation analysis of upregulated genes (FDR<0.05, Log2(FC)>1) in inflammatory microglia in response to ICH
Enrichment FDR	nGenes	Pathway Genes	Fold Enrichment	Pathway	Genes
1.67242753239047e-07	23	156	4.64641	Path:mmu04110 Cell cycle	Espl1 Cdc20 Bub1 Bub1b Ccna2 Ccnb2 Ccne2 Cdk1 Cdc45 Cdc7 Cdkn2c E2f1 Mcm2 Mcm6 Plk1 Rbl1 Tfdp1 Tgfb1 Ttk Pkmyt1 Ndc80 Esco2 Knl1
8.30424154760386e-06	18	136	4.57043	Path:mmu04142 Lysosome	Gusb Arsb Atp6v0a1 Cd68 Tpp1 Ctsb Ctsc Ctsd Ctsh Ctsl Hexa Lamp1 Lipa Naglu Nagpa Gnptab Ctsz Fuca1
9.80143857984347e-06	11	145	7.61103	Path:mmu05322 Systemic lupus erythematosus	C1qa Fcgr1 H2ac6 H2ac7 H2ac8 H2ac11 H2ac22 H2ac24 H2ac4 H2ac13 H2ac23
3.48969550805589e-05	11	83	6.61829	Path:mmu04612 Antigen processing and presentation	Calr Canx Creb1 Ctsb Ctsl Pdia3 H2-K1 H2-M3 H2-T24 Nfya Ifi30
0.000725757	13	204	4.13556	Path:mmu04613 Neutrophil extracellular trap formation	Cyba Fcgr1 Tlr2 H2ac6 H2ac7 H2ac8 H2ac11 H2ac22 H2ac24 H2ac4 H2ac13 H2ac23 Hdac9
0.00372701	9	83	4.79016	Path:mmu01232 Nucleotide metabolism	Dck Enpp1 Rrm2 Tk1 Dtymk Tyms Xdh Ntpcr Cmpk1
0.00372701	18	243	2.75236	Path:mmu05166 Human T-cell leukemia virus 1 infection	Espl1 Cdc20 Adcy7 Bub1b Calr Canx Ccna2 Ccnb2 Ccne2 Cdkn2c Creb1 E2f1 H2-K1 H2-M3 H2-T24 Il2rg Nrp1 Tgfb1
0.00505593	13	174	3.30086	Path:mmu04145 Phagosome	Atp6v0a1 Calr Canx Ctsl Cyba Fcgr1 H2-K1 H2-M3 H2-T24 Itga5 Itgb5 Lamp1 Tlr2
0.00630541	11	201	3.6243	Path:mmu05034 Alcoholism	Creb1 H2ac6 H2ac7 H2ac8 H2ac11 H2ac22 H2ac24 H2ac4 H2ac13 H2ac23 Hdac9
0.00637036	13	163	3.15609	Path:mmu04148 Efferocytosis	Abca1 Adam17 Adam9 Bsg C1qa Calr Ch25h Creb1 Gas6 Itgb5 Lipa Pros1 Tgfb1
0.00642716	7	56	5.38154	Path:mmu00240 Pyrimidine metabolism	Dck Enpp1 Rrm2 Tk1 Dtymk Tyms Cmpk1
0.00704374	7	42	5.23609	Path:mmu03440 Homologous recombination	Bard1 Brca1 Rad51 Rad51b Rad54l Brip1 Rad54b
0.00717427	12	176	3.19344	Path:mmu04217 Necroptosis	Eif2ak2 Stat1 H2ac6 H2ac7 H2ac8 H2ac11 H2ac22 H2ac24 H2ac4 H2ac13 Zbp1 H2ac23
0.00717427	7	89	5.0983	Path:mmu04512 ECM-receptor interaction	Npnt Fn1 Hmmr Itga5 Itga6 Itgb5 Spp1
0.0112176	14	209	2.72867	Path:mmu05168 Herpes simplex virus 1 infection	Calr Pdia3 H2-K1 H2-M3 H2-T24 Itga5 Eif2ak2 Ccl2 Srpk1 Stat1 Tlr2 Oas1a Irf7 Bst2
0.015859	6	44	5.03209	Path:mmu00513 Various types of N-glycan biosynthesis	Rpn1 Ddost Hexa Rpn2 Ostc Magt1
0.015859	10	122	3.21819	Path:mmu04114 Oocyte meiosis	Espl1 Cdc20 Adcy7 Bub1 Ccnb2 Ccne2 Cdk1 Igf1 Plk1 Pkmyt1
0.015859	11	198	3.01427	Path:mmu04814 Motor proteins	Kifc1 Kif11 Myo1f Kif15 Kif18a Kif20b Tpm4 Kif14 Kif18b Kif23 Kif2c
0.023912	4	21	7.38039	Path:mmu00531 Glycosaminoglycan degradation	Gusb Arsb Hexa Naglu
0.023912	10	293	3.00831	Path:mmu04060 Cytokine-cytokine receptor interaction	Acvrl1 Ccr5 Csf1 Csf2ra Il2rg Ccl2 Ccl4 Tgfb1 Tnfrsf11a Cxcl16
0.0241812	17	354	2.20892	Path:mmu05165 Human papillomavirus infection	Atp6v0a1 Ccna2 Ccne2 Creb1 E2f1 Fn1 H2-K1 H2-M3 H2-T24 Itga5 Itga6 Itgb5 Jag1 Eif2ak2 Rbl1 Spp1 Stat1
0.0258967	13	171	2.48134	Path:mmu04141 Protein processing in endoplasmic reticulum	Rpn1 Pdia4 Calr Canx Ddost Pdia3 Nfe2l2 Rpn2 Hsp90b1 Ostc Magt1 Erp29 Pdia6
0.0258967	14	224	2.40665	Path:mmu05169 Epstein-Barr virus infection	Calr Ccna2 Ccne2 E2f1 Pdia3 H2-K1 H2-M3 H2-T24 Eif2ak2 Stat1 Vim Tlr2 Oas1a Irf7
0.0258967	13	222	2.48134	Path:mmu05203 Viral carcinogenesis	Cdc20 Ccna2 Ccne2 Cdk1 Ccr5 Creb1 H2-K1 H2-M3 H2-T24 Eif2ak2 Rbl1 Irf7 Hdac9
0.027611	7	87	3.72568	Path:mmu05323 Rheumatoid arthritis	Atp6v0a1 Csf1 Ctsl Ccl2 Tgfb1 Tnfrsf11a Tlr2
0.0313993	9	303	3.00106	Path:mmu05171 Coronavirus disease-COVID-19	Adam17 C1qa C3ar1 Nrp1 Eif2ak2 Ccl2 Stat1 Tlr2 Oas1a
0.0335895	8	93	3.20887	Path:mmu04914 Progesterone-mediated oocyte maturation	Adcy7 Bub1 Ccna2 Ccnb2 Cdk1 Igf1 Plk1 Pkmyt1
0.0342918	5	50	4.77181	Path:mmu04979 Cholesterol metabolism	Abca1 Apoc1 Lipa Soat1 Mylip
0.0403279	7	103	3.39886	Path:mmu05414 Dilated cardiomyopathy	Adcy7 Igf1 Itga5 Itga6 Itgb5 Tgfb1 Tpm4
0.043167	5	94	4.46395	Path:mmu00983 Drug metabolism-other enzymes	Gusb Rrm2 Tk1 Xdh Cmpk1

## Sheet: S5
Table S5. Significantly enriched KEGG pathways in over-representation analysis of upregulated genes (FDR<0.05, Log2(FC)>1) in homeostatic microglia in response to ICH
Enrichment FDR	nGenes	Pathway Genes	Fold Enrichment	Pathway	Genes
1.27661e-12	26	156	6.80891	Path:mmu04110 Cell cycle	Espl1 Cdc20 Bub1 Ccnb2 Ccne1 Ccne2 Cdk1 Cdc45 Cdc7 Chek1 E2f1 Mcm2 Mcm5 Mcm6 Plk1 Rbl1 Ttk E2f2 Pkmyt1 Chek2 Mad2l1 Ndc80 Fbxo5 Esco2 Knl1 Ticrr
1.12863e-06	11	145	9.60231	Path:mmu05322 Systemic lupus erythematosus	C3 C4b H2ac6 H2ac7 H2ac8 H2ac11 H2ac22 H2ac24 H2ac4 H2ac13 H2ac23
1.37718e-05	15	176	5.13972	Path:mmu04217 Necroptosis	Pygl Cybb Eif2ak2 Stat1 H2ac6 H2ac7 H2ac8 H2ac11 H2ac22 H2ac24 H2ac4 H2ac13 Zbp1 H2ac23 Pycard
0.000115576	8	36	8.88809	Path:mmu03030 DNA replication	Lig1 Mcm2 Mcm5 Mcm6 Pola1 Pole Pole2 Prim1
0.000130595	12	303	5.176	Path:mmu05171 Coronavirus disease-COVID-19	C3 C4b Cybb Masp1 Nrp1 Eif2ak2 Ccl12 Ccl2 Stat1 Oas1g Oas2 Oas1a
0.000178132	12	122	4.94338	Path:mmu04114 Oocyte meiosis	Adcy3 Espl1 Cdc20 Bub1 Ccnb2 Ccne1 Ccne2 Cdk1 Plk1 Pkmyt1 Mad2l1 Fbxo5
0.000977798	11	204	4.48108	Path:mmu04613 Neutrophil extracellular trap formation	C3 Cybb H2ac6 H2ac7 H2ac8 H2ac11 H2ac22 H2ac24 H2ac4 H2ac13 H2ac23
0.00115419	16	243	3.18812	Path:mmu05166 Human T-cell leukemia virus 1 infection	Adcy3 Espl1 Cdc20 Tspo Ccnb2 Ccne1 Ccne2 Chek1 E2f1 H2-K1 H2-Q7 Il2rg Nrp1 E2f2 Chek2 Mad2l1
0.00128117	7	42	6.93631	Path:mmu03440 Homologous recombination	Bard1 Brca1 Rad51 Rad51b Rad54l Brip1 Rad54b
0.00334638	10	135	3.98515	Path:mmu03082 ATP-dependent chromatin remodeling	H2ac6 H2ac7 H2ac8 H2ac11 H2ac22 H2ac24 H2ac4 H2ac13 H2ac23 Brd8
0.00334638	13	209	3.22043	Path:mmu05168 Herpes simplex virus 1 infection	C3 H2-K1 H2-Q7 Eif2ak2 Ccl12 Ccl2 Sp100 Stat1 Oas1g Oas2 Oas1a Irf7 Bst2
0.00334638	14	224	3.11083	Path:mmu05169 Epstein-Barr virus infection	Ccne1 Ccne2 Cd44 E2f1 H2-K1 H2-Q7 Eif2ak2 Stat1 Vim Oas1g E2f2 Oas2 Oas1a Irf7
0.00334638	13	222	3.22043	Path:mmu05203 Viral carcinogenesis	Cdc20 C3 Ccne1 Ccne2 Cdk1 Chek1 H2-K1 H2-Q7 Eif2ak2 Rbl1 Sp100 Gsn Irf7
0.00377796	8	75	4.73076	Path:mmu04115 p53 signaling pathway	Ccnb2 Ccne1 Ccne2 Cdk1 Chek1 Rrm2 Gtse1 Chek2
0.00377796	12	179	3.33303	Path:mmu04218 Cellular senescence	Ccnb2 Ccne1 Ccne2 Cdk1 Chek1 E2f1 Foxm1 H2-K1 H2-Q7 Rbl1 E2f2 Chek2
0.00795145	9	201	3.79276	Path:mmu05034 Alcoholism	H2ac6 H2ac7 H2ac8 H2ac11 H2ac22 H2ac24 H2ac4 H2ac13 H2ac23
0.00911968	10	198	3.39476	Path:mmu04814 Motor proteins	Kifc1 Kif11 Kif20a Kif15 Cenpe Kif20b Kif18b Kif23 Tubb2b Kif2c
0.0140281	10	165	3.18812	Path:mmu05160 Hepatitis C	E2f1 Ifit1 Eif2ak2 Stat1 Oas1g E2f2 Oas2 Oas1a Irf7 Rsad2
0.0150644	6	52	4.78218	Path:mmu03460 Fanconi anemia pathway	Fancm Brca1 Fanca Rad51 Fanci Brip1
0.0150644	11	208	2.90142	Path:mmu04621 NOD-like receptor signaling pathway	Cybb Ifi204 Ccl12 Ccl2 Stat1 Oas1g Oas2 Oas1a Irf7 Nlrp1b Pycard
0.0150644	10	173	3.13362	Path:mmu05164 Influenza A	Eif2ak2 Ccl12 Ccl2 Stat1 Oas1g Oas2 Oas1a Irf7 Rsad2 Pycard
0.0157615	9	144	3.2997	Path:mmu05162 Measles	Ccne1 Ccne2 Il2rg Eif2ak2 Stat1 Oas1g Oas2 Oas1a Irf7
0.0315332	5	89	4.82413	Path:mmu04512 ECM-receptor interaction	Cd44 Fn1 Hmmr Spp1 Itgb8
0.0315332	7	93	3.56449	Path:mmu04914 Progesterone-mediated oocyte maturation	Adcy3 Bub1 Ccnb2 Cdk1 Plk1 Pkmyt1 Mad2l1

## Sheet: S6
Table S6. Significantly enriched KEGG pathways in Gene set enrichment analysis in inflammatory microglia in response to ICH
ID	Description	setSize	enrichmentScore	NES	pvalue	p.adjust	qvalue	rank	leading_edge	core_enrichment
mmu04142	Lysosome	108	0.801641	2.56883	1e-10	3.41e-08	2.36842105263158e-08	912	tags=43%, list=8%, signal=39%	13033/64138/13030/12514/11881/19141/13036/15211/13032/110006/19025/16889/16783/15212/27419/13039/11975/14466/16784/66848/432486/27426/17113/71665/11984/12757/67963/12512/50917/19063/94178/54411/11883/192654/240283/14387/110173/211286/11774/14667/11886/16792/211329/214505/11766/17775
mmu04612	Antigen processing and presentation	51	0.79531	2.269	1.83871215323629e-06	0.000227383	0.000157929	350	tags=27%, list=3%, signal=27%	13030/65972/19141/14827/12317/18044/13039/12330/15042/12010/14828/14972/12912/14991
mmu04728	Dopaminergic synapse	116	-0.578484	-2.03772	2.00043551986423e-06	0.000227383	0.000157929	1637	tags=41%, list=15%, signal=36%	75600/14281/16438/224129/23797/66066/71978/11651/11909/12315/13195/14677/14802/19045/56637/14697/14681/14799/14688/26931/18752/14702/269643/14708/26414/225849/18795/29857/18751/53623/14800/19055/14811/12322/18749/68566/16519/12323/14812/19052/12288/72930/16524/14706/51792/19049/231991/11911
mmu04082	Neuroactive ligand signaling	146	-0.536817	-1.9532	3.43861374520685e-06	0.000234513	0.000162882	2256	tags=43%, list=20%, signal=35%	170483/14814/14672/11444/11512/14709/110886/15565/15563/14696/14401/14806/64337/15551/14805/11515/14406/12647/18441/224129/66066/11540/15558/15561/14810/15560/11551/15550/14395/14677/14802/210044/14396/14658/14697/14681/14799/14688/11423/18752/11554/14702/18442/14708/18795/18751/53623/14800/14402/14811/108071/18749/14809/14812/14813/18976/14706/108073/54393/108069/70155/11555/11542
mmu04010	MAPK signaling pathway	240	-0.467159	-1.80375	2.87079520235477e-06	0.000234513	0.000162882	1871	tags=26%, list=17%, signal=22%	12293/71751/26397/13714/26921/19043/14180/12291/72349/14281/23797/12294/54635/12300/11651/11909/23882/16653/19042/12367/26398/329502/14184/14183/12290/14182/12298/16337/19259/19418/19419/19697/18752/14254/19395/26414/29857/18212/18751/16179/12297/26406/19055/26413/18749/17532/19417/16151/17762/12288/26405/18218/53608/16476/18596/19058/16001/70686/16478/12475/19252/11911
mmu05235	PD-L1 expression and PD-1 checkpoint pathway in cancer	75	-0.613338	-2.01282	1.66088346530376e-05	0.00082073	0.000570039	1602	tags=33%, list=14%, signal=29%	14281/23797/18710/11651/16653/19247/19419/19697/381319/16452/16451/29857/26406/19055/26413/78798/19211/16151/15979/18803/18708/16476/19058/18035/18036
mmu04724	Glutamatergic synapse	93	-0.583264	-1.96375	1.9254664380243e-05	0.00082073	0.000570039	1862	tags=47%, list=17%, signal=40%	14806/64337/14805/11515/16438/224129/66066/320129/14810/241638/224997/14677/329502/14802/210044/14697/14681/14799/14688/18752/14702/14708/18795/18751/53623/26557/14800/19055/14811/108071/26413/18749/16519/14809/14812/14813/12288/13385/14706/108073/108069/26562/19058/14645
mmu05022	Pathways of neurodegeneration - multiple diseases	343	-0.40284	-1.60836	1.90925831722347e-05	0.00082073	0.000570039	1824	tags=22%, list=16%, signal=19%	26397/17995/14365/12313/17463/102631912/66445/75600/66495/16438/66142/57296/12421/12048/11789/27373/12315/16653/19166/329015/14810/14296/66218/12367/18039/70316/14802/67089/73916/12569/19182/407790/67790/56637/14366/26446/69590/14799/50873/19697/18752/22123/19122/27412/11950/407785/51897/26414/26444/18795/29857/18751/53623/14800/212398/19055/14811/108071/12322/26413/12323/26443/14812/14813/17762/…
mmu05031	Amphetamine addiction	60	-0.661187	-2.08204	2.91911383173435e-05	0.00110602	0.000768188	1637	tags=47%, list=15%, signal=40%	75600/14281/224129/11909/12315/14810/13195/14802/19045/14799/18752/12326/18751/53623/14800/19055/14811/12322/18749/12323/14812/14813/12288/16476/19058/19049/231991/11911
mmu04659	Th17 cell differentiation	73	-0.609253	-1.98336	9.3214330581271e-05	0.00288964	0.00200701	864	tags=26%, list=8%, signal=24%	11622/19697/15001/16452/26414/16451/29857/19055/26413/15516/16151/15979/18803/16476/19058/16193/18035/18036/16194
mmu04137	Mitophagy - animal	67	-0.611378	-1.96711	8.66776604032221e-05	0.00288964	0.00200701	1540	tags=31%, list=14%, signal=27%	12177/213948/12048/16653/23806/68350/94044/50873/19697/245860/26414/57436/14232/17532/59040/68943/56484/66734/17684/16476/11911
mmu04713	Circadian entrainment	82	-0.577513	-1.9311	0.000123698	0.00351508	0.00244141	2115	tags=56%, list=19%, signal=46%	11512/11516/14709/14696/239556/64337/12313/11515/75600/12291/14281/16438/224129/19092/66066/12315/14810/14677/14802/210044/14697/14681/14799/14688/18752/14702/14708/18795/11517/18751/53623/14800/14811/12322/26413/18749/16519/12323/14812/14813/18627/12288/16524/14706/54195/18626
mmu04110	Cell cycle	120	0.599768	1.93562	0.000134521	0.0035286	0.0024508	1648	tags=47%, list=15%, signal=40%	76464/12580/19650/71988/12534/19645/12235/12428/18817/107995/12442/12545/17219/67052/12544/268930/17216/13555/105988/12236/328572/12448/17215/27214/104394/50883/67849/12532/17220/67141/12447/67177/12566/17218/17217/12531/59008/66440/56150/66671/21770/18393/73699/320209/23834/13557/217232/71521/71175/68999/20877/69010/56371/12530/242705/12649
mmu04145	Phagosome	101	0.62673	1.99459	0.000194516	0.00353867	0.00245779	847	tags=23%, list=8%, signal=21%	16419/12317/16783/16409/14129/13057/13039/11975/16784/12330/15042/14972/17113/11984/16402/17969/14991/17972/16410/54411/16412/14964/17970
mmu04148	Efferocytosis	119	0.592636	1.91474	0.000217924	0.00353867	0.00245779	828	tags=20%, list=7%, signal=19%	14456/12259/16419/12317/12642/16889/11303/12262/11491/11502/12215/19128/12912/11487/108058/11980/17289/16410/192654/16971/330662/15170/12260/12894
mmu04066	HIF-1 signaling pathway	83	-0.564219	-1.88364	0.000165036	0.00353867	0.00245779	911	tags=25%, list=8%, signal=23%	16337/15275/19697/18752/11676/14254/11863/18751/16832/12322/26413/13819/12323/15979/18803/18708/12575/16193/16001/170768/16194
mmu04726	Serotonergic synapse	94	-0.546815	-1.8397	0.000178225	0.00353867	0.00245779	2055	tags=40%, list=19%, signal=33%	14709/15565/15563/14696/140492/14401/64337/15551/16438/224129/66066/15558/19224/16653/15561/15560/12367/15550/13195/14677/329502/14697/14681/14688/18752/14702/56448/14708/18795/18751/14402/26413/18749/16519/12288/16524/14706/19252
mmu04658	Th1 and Th2 cell differentiation	71	-0.56645	-1.83391	0.000196326	0.00353867	0.00245779	788	tags=24%, list=7%, signal=22%	19697/15001/16452/26414/16451/29857/433586/19055/26413/16151/15979/18803/54485/16476/19058/18035/18036
mmu04150	mTOR signaling pathway	103	-0.524629	-1.79737	0.000213525	0.00353867	0.00245779	1598	tags=23%, list=14%, signal=20%	108664/23797/14245/69008/18710/11651/320311/18607/16653/56637/14366/16337/18752/245670/97998/18751/109270/26413/19211/18708/16001/74370/12283/74747
mmu04022	cGMP-PKG signaling pathway	137	-0.48937	-1.76243	0.000179392	0.00353867	0.00245779	1802	tags=31%, list=16%, signal=26%	16523/12313/11515/13618/11931/75600/16438/224129/19092/23797/11928/11651/13617/11909/12315/11551/14677/210044/11932/19045/11941/16337/16531/11554/18795/19055/17258/26413/320707/58802/381290/12288/18754/54195/14674/19058/384783/11555/231991/207728/11542/11911
mmu04024	cAMP signaling pathway	179	-0.457922	-1.70584	0.000204906	0.00353867	0.00245779	1868	tags=40%, list=17%, signal=34%	74055/26417/14632/12064/18018/12314/18578/20130/170483/14814/11936/208647/11512/11516/15565/98660/18166/15551/12313/11515/16890/11931/75600/14281/224129/23797/11928/18710/11540/11651/18429/13617/12315/23984/14810/15550/14677/14802/210044/11932/19045/11941/14799/19697/11554/17356/12326/56508/26414/238871/11517/53623/14062/14800/14811/12322/26413/18749/320707/12323/14812/381290/14813/12288/18976/54…
mmu03030	DNA replication	34	0.788003	2.08094	0.000232501	0.00360377	0.002503	1591	tags=65%, list=14%, signal=56%	18973/18968/17219/327762/17216/16881/17215/18971/19076/17220/19075/69724/17218/17217/69263/106344/19891/18974/67967/68240/68209/72151
mmu04723	Retrograde endocannabinoid signaling	129	-0.50156	-1.78882	0.000246141	0.00364931	0.00253464	2117	tags=40%, list=19%, signal=33%	12801/11512/68198/14709/110886/66108/19094/14696/14401/64337/17995/102631912/11515/66495/14406/16438/224129/14073/66066/66218/14395/14677/70316/14802/210044/14396/407790/116837/14697/14681/14799/14688/18752/14702/407785/14708/26414/18795/29857/18751/53623/14800/14402/108071/26413/18749/16519/12288/23945/16524/14706/68202
mmu04720	Long-term potentiation	58	-0.625428	-1.96709	0.000284312	0.00379918	0.00263873	1314	tags=40%, list=12%, signal=35%	12315/16653/14810/19045/58200/14799/18752/12326/18795/18751/14800/19055/14811/108071/12322/26413/18749/12323/14812/14813/12288/19058/11911
mmu04722	Neurotrophin signaling pathway	95	-0.53114	-1.79318	0.000278489	0.00379918	0.00263873	1672	tags=40%, list=15%, signal=34%	192662/108960/19164/14570/107746/19094/12313/18213/75600/73914/23797/18710/11651/18607/12315/16653/19247/18753/17179/12070/56637/19697/12326/26414/29857/18212/16179/26406/12322/26413/12323/18803/56484/18708/16476/18035/18036/11911
mmu04261	Adrenergic signaling in cardiomyocytes	120	-0.497551	-1.75242	0.000289674	0.00379918	0.00263873	2173	tags=41%, list=20%, signal=33%	11936/208647/11512/30955/81904/19094/12293/98660/12313/11515/11931/75600/224129/23797/12294/71978/12300/11928/11651/11909/12315/14677/210044/11932/19045/11941/12298/58200/26931/11554/56508/269643/225849/18795/29857/12297/12322/26413/18749/320707/12323/381290/19052/12288/72930/51792/11555/231991/11911
mmu04080	Neuroactive ligand-receptor interaction	234	-0.42439	-1.63101	0.000306405	0.00386979	0.00268777	2027	tags=27%, list=18%, signal=22%	14714/110886/15565/15563/18439/19109/11998/12802/14401/14806/14289/18166/15551/14805/23936/13618/14406/14745/18441/71897/237213/11540/15558/18429/13617/14803/14810/15560/11551/15550/14395/14802/14396/11443/12424/14658/14799/14815/11554/207911/18442/11517/12273/53623/14600/14062/19228/14800/14402/14811/108071/14809/14812/14813/18976/108073/54393/108069/70155/11555/53978/53328/11542
mmu04932	Non-alcoholic fatty liver disease	124	-0.490482	-1.74478	0.00036666	0.00446539	0.00310144	2064	tags=27%, list=19%, signal=22%	68198/66108/19094/12857/17995/102631912/66445/66495/14281/23797/66142/12125/18710/11651/66218/12367/70316/407790/56637/16337/19697/407785/26414/29857/12868/68202/18708/16476/16193/384783/208104/16194/11911
mmu04141	Protein processing in endoplasmic reticulum	100	0.605378	1.92936	0.000428896	0.00494068	0.00343156	1131	tags=29%, list=10%, signal=26%	14827/103963/13200/12317/67397/12304/22027/71853/20014/12330/18024/67075/14828/66357/192193/50527/18453/66861/230815/216197/56453/27061/13135/12017/14376/12028/17156/100037258/66967
mmu05010	Alzheimer disease	278	-0.393956	-1.53759	0.000434664	0.00494068	0.00343156	2281	tags=28%, list=21%, signal=23%	12364/13000/16572/19185/14814/19164/14367/19167/13544/68198/66108/17380/12857/234664/17995/14365/12313/17463/102631912/66445/75600/66495/11785/16438/23797/66142/18710/57296/11651/12421/11789/27373/12315/16653/19166/329015/14810/14296/66218/12367/70316/67089/12569/19182/407790/56637/14366/26446/16337/19697/22123/27412/11950/407785/51897/26414/26444/18795/212398/19055/68318/14811/108071/26413/26443…
mmu05033	Nicotine addiction	32	-0.670463	-1.89699	0.000539175	0.00590526	0.00410151	2760	tags=66%, list=25%, signal=49%	14394/14403/14407/12287/170483/14814/11444/110886/14401/14406/14810/14395/14802/14396/14799/53623/14800/14402/14811/14812/14813
mmu04012	ErbB signaling pathway	69	-0.554832	-1.78913	0.000571477	0.00590526	0.00410151	1542	tags=30%, list=14%, signal=26%	23797/18710/11651/16653/83961/100042150/26398/56637/18752/11352/26414/211323/18751/18183/12322/26413/12323/18803/18708/16476/12575
mmu04660	T cell receptor signaling pathway	103	-0.50744	-1.73849	0.000555638	0.00590526	0.00410151	1602	tags=27%, list=14%, signal=23%	14281/23797/71978/18710/11651/18607/16653/19247/56637/19419/19697/26931/269643/26414/225849/29857/19055/26413/16151/19052/72930/18803/51792/18708/16476/19058/18035/18036
mmu04210	Apoptosis	109	0.59333	1.91501	0.000703884	0.006938	0.0048188	83	tags=6%, list=1%, signal=6%	13033/64138/13030/13036/13032/13039
mmu04931	Insulin resistance	78	-0.563253	-1.86324	0.000712111	0.006938	0.0048188	1542	tags=33%, list=14%, signal=29%	23797/228966/18710/11651/18607/19247/18753/19045/53412/56637/19268/16337/22260/19697/26414/18751/19309/19211/18754/18708/76055/16193/384783/18035/231991/208104
mmu05231	Choline metabolism in cancer	74	-0.545849	-1.78744	0.000882703	0.00836116	0.00580726	1602	tags=26%, list=14%, signal=22%	14281/23797/54635/18710/11651/18607/16653/18717/329502/18752/26414/18751/26413/18803/13139/18708/16476/18596/12660
mmu05030	Cocaine addiction	46	-0.639314	-1.94235	0.000960055	0.00852179	0.00591882	1380	tags=37%, list=12%, signal=32%	11909/14810/13195/14677/12569/19697/14800/14811/18749/14812/14813/13385/108069/16476/19049/231991/11911
mmu05032	Morphine addiction	82	-0.533979	-1.78552	0.000974632	0.00852179	0.00591882	2115	tags=45%, list=19%, signal=37%	11512/14709/110886/14696/14401/64337/11515/18584/14406/224129/66066/320129/23984/14395/29863/14677/210044/14396/14697/14681/14688/18752/18573/14702/14708/238871/18751/14402/18749/16519/16524/14706/54393/26385/218461/207728/18574
mmu04725	Cholinergic synapse	102	-0.50953	-1.7463	0.00094643	0.00852179	0.00591882	2189	tags=44%, list=20%, signal=36%	14672/11444/208647/11512/30955/14709/14696/16520/64337/11515/14281/16438/12647/224129/23797/66066/18710/11651/16653/14677/210044/14697/14681/14688/16536/226922/11423/18752/12326/14702/16452/14708/18795/18751/110862/12322/26413/18749/16519/12323/12288/14706/18708/231991/11911
mmu05012	Parkinson disease	169	-0.429515	-1.58934	0.00100639	0.00857943	0.00595886	1815	tags=24%, list=16%, signal=21%	17995/12313/17463/102631912/66445/75600/66495/16438/224129/66142/57296/11540/12048/12315/19166/66218/12367/14677/70316/67089/19182/407790/26446/50873/22123/11950/407785/26414/26444/12322/18749/12323/26443/17762/12868/18803/68943/68202/11947/19252/11911
mmu03440	Homologous recombination	31	0.776154	2.019	0.00113733	0.00936899	0.00650725	1721	tags=71%, list=16%, signal=60%	237911/19363/19361/12021/19366/623474/12189/225182/12190/18971/17535/233826/12144/68251/19891/67967/210766/268465/68240/71711/11920/19360
mmu04152	AMPK signaling pathway	100	-0.485564	-1.65141	0.00115395	0.00936899	0.00650725	1542	tags=26%, list=14%, signal=23%	23797/71978/69008/18710/11651/18607/207565/56690/68365/14104/16337/26931/269643/225849/15568/19052/72930/56484/51792/18708/16001/384783/231991/74370/170768/12283
mmu04310	Wnt signaling pathway	115	-0.466824	-1.63903	0.00148307	0.0117611	0.00816866	2399	tags=33%, list=22%, signal=26%	18018/73739/16842/13000/19164/14367/13544/381104/14735/14365/67772/12445/13016/11789/27373/76441/14296/103583/72293/56637/14366/18163/18752/27412/26414/243548/18795/18751/20378/212398/19055/12322/18749/12323/106042/16476/19058/67087
mmu00513	Various types of N-glycan biosynthesis	37	0.723599	1.93665	0.001528	0.011842	0.0082249	1081	tags=43%, list=10%, signal=39%	15211/103963/13200/15212/20014/67075/66357/230815/223774/13135/217664/66789/102580/269181/17156/208624
mmu04926	Relaxin signaling pathway	100	-0.476446	-1.62039	0.00176797	0.0133973	0.00930509	2139	tags=37%, list=19%, signal=30%	208647/11512/14709/19094/14696/64337/11515/13618/14281/224129/23797/66066/18710/11651/11909/16653/26398/14677/210044/14697/14681/14688/19697/12826/14702/14708/26414/18795/29857/26413/18749/14706/18708/16476/18035/231991/11911
mmu04925	Aldosterone synthesis and secretion	83	-0.510324	-1.70371	0.00208567	0.0154611	0.0107386	1937	tags=42%, list=17%, signal=35%	16527/239556/98660/12313/11515/16890/11931/75600/12291/16438/224129/11928/11909/12315/75292/210044/11932/11941/18752/223604/12326/215303/18795/18751/12322/18749/320707/12323/381290/12288/18754/18976/231991/207728/11911
mmu04727	GABAergic synapse	69	-0.52322	-1.68719	0.00247492	0.0179563	0.0124716	2115	tags=45%, list=19%, signal=37%	11512/14709/110886/14696/14401/64337/11515/14406/224129/66066/14395/14677/210044/14396/14697/14681/14688/227120/18752/14702/14708/57436/18751/14402/18749/14415/12288/268566/14706/54393/14645
mmu04742	Taste transduction	41	-0.61676	-1.82207	0.00287297	0.020401	0.0141695	2115	tags=39%, list=19%, signal=32%	11512/110886/64337/15551/18441/15561/15550/14395/14396/11418/18573/18795/18749/12288/54393/18574
mmu04014	Ras signaling pathway	191	-0.411438	-1.53909	0.00293152	0.020401	0.0141695	2473	tags=37%, list=22%, signal=29%	74055/26417/13640/15566/12064/16002/12314/20130/19415/214230/14164/14173/241694/14709/56044/66350/14696/64337/12313/14180/75600/226525/23797/66066/54635/18710/11651/85031/12048/12315/16653/14810/19247/329502/14184/14183/14182/16337/14697/14688/19418/19419/19697/18752/17356/14702/14254/54354/225870/11352/19395/14708/26414/18212/18751/14811/26413/18749/17532/19417/14812/16151/18803/14706/54601/1973…
mmu04390	Hippo signaling pathway	100	-0.461221	-1.56861	0.00304273	0.0207514	0.014413	3210	tags=44%, list=29%, signal=32%	21679/22423/216795/11839/22062/170788/216033/12161/13383/12156/29806/13542/11705/58220/16842/14164/93737/14367/12160/13544/14365/23859/12445/71978/319710/53310/11789/27373/16798/68473/103583/72293/19045/56637/14366/12162/269643/12386/19052/11796/72930/13385/51792/15902
mmu00511	Other glycan degradation	17	0.83778	1.96452	0.00317267	0.0212133	0.0147338	675	tags=41%, list=6%, signal=39%	15211/15212/17160/14466/66848/71665/110173
mmu05017	Spinocerebellar ataxia	115	-0.437237	-1.53515	0.00456659	0.0295599	0.0205309	1587	tags=28%, list=14%, signal=24%	16438/23797/18710/57296/11651/12421/19166/329015/14810/67134/67089/56543/19182/19699/65115/26446/114896/14799/18752/22123/51897/26414/26444/18795/18751/53623/14800/14811/26443/14812/14813/18708
mmu04020	Calcium signaling pathway	193	-0.398176	-1.4959	0.00459436	0.0295599	0.0205309	2290	tags=32%, list=21%, signal=26%	18216/12287/170483/14814/14164/14672/14173/15565/15563/18439/239556/19229/12313/11515/14180/13618/18213/75600/12291/16438/54635/11540/15558/13617/12315/14810/15560/210044/14184/14183/12290/11941/14182/68961/18752/18573/11554/12326/14254/215303/18795/18212/18751/14062/19055/14811/108071/228550/12322/18749/320707/12323/14812/381290/14813/12288/18803/18596/19058/11555/18574
mmu05206	MicroRNAs in cancer	124	-0.428955	-1.52591	0.00510984	0.0322677	0.0224116	771	tags=14%, list=7%, signal=13%	18752/108655/208727/17250/18751/26413/19211/18754/18803/18569/18708/18596/12575/384783/74370/171543/74747
mmu04730	Long-term depression	55	-0.54759	-1.71102	0.00535401	0.0331949	0.0230556	1587	tags=35%, list=14%, signal=30%	16438/19092/16653/14677/329502/14681/14799/18752/14687/18795/18751/53623/14800/26413/19052/54195/14674/51792/16001
mmu05014	Amyotrophic lateral sclerosis	270	-0.366123	-1.43028	0.00574318	0.0349719	0.0242898	1824	tags=21%, list=16%, signal=18%	26397/17995/17463/102631912/66445/234865/382562/66495/66142/17184/57296/12421/12048/269966/83961/19166/237082/329015/14810/66218/11750/12367/100042150/18039/70316/67089/19182/407790/67790/26446/69590/66679/14799/103172/50873/22123/11950/407785/51897/26444/211323/29857/18183/14800/19055/14811/227720/26443/14812/14813/12868/18645/68943/66734/68202/11947/19058/11911
mmu04081	Hormone signaling	144	-0.410645	-1.49372	0.00636543	0.0380809	0.0264492	2203	tags=31%, list=20%, signal=25%	13371/14672/11512/16416/14709/14714/13982/19109/14696/11998/64337/18162/11515/224129/19092/66066/18710/18429/54409/11551/14677/210044/12424/16337/14697/14681/14688/11554/14702/76854/56508/207911/16452/14708/18795/14600/19228/18749/18976/14706/14674/18708/16001/384783/11555
mmu04550	Signaling pathways regulating pluripotency of stem cells	94	-0.467635	-1.5733	0.00661343	0.0388824	0.0270058	1542	tags=32%, list=14%, signal=28%	14173/14367/13544/19094/15904/14365/23797/16323/18710/11651/11789/16653/22658/14184/14183/56637/14182/15903/14366/16452/11480/16451/29857/26413/13395/16880/16600/18708/16001/15902
mmu04979	Cholesterol metabolism	30	0.738334	1.91652	0.00690901	0.0399317	0.0277347	768	tags=27%, list=7%, signal=25%	218203/16889/11303/67963/11812/16976/16971/100017
mmu04961	Endocrine and other factor-regulated calcium reabsorption	42	-0.552482	-1.63153	0.00722145	0.0410419	0.0285057	2182	tags=55%, list=20%, signal=44%	74325/11936/11512/13430/13982/98660/11515/11931/11772/11928/11932/12307/11941/11771/18752/18795/18751/19228/18749/320707/381290/13429/103967
mmu03460	Fanconi anemia pathway	43	0.682118	1.88986	0.00788233	0.0430578	0.0299059	2444	tags=58%, list=22%, signal=46%	237911/19361/14087/208836/12189/12190/211651/80905/20892/233826/12144/19891/237211/104806/235610/268465/68240/71711/69928/114714/245000/27015/60534/14088/101831
mmu04929	GnRH secretion	54	-0.539756	-1.6815	0.00799348	0.0430578	0.0299059	2543	tags=44%, list=23%, signal=34%	109689/26417/140493/15168/14672/14714/140492/239556/12291/16438/23797/18710/11651/16653/18752/76854/18795/18751/26413/16519/12288/16524/54393/18708
mmu04211	Longevity regulating pathway	75	-0.487223	-1.59894	0.00781209	0.0430578	0.0299059	1560	tags=28%, list=14%, signal=24%	224129/23797/18710/11651/11909/12421/16653/207565/210044/16337/19697/12326/51897/18749/56484/18708/16001/384783/231991/74370/11911
mmu04921	Oxytocin signaling pathway	132	-0.431604	-1.54507	0.00808123	0.0430578	0.0299059	1871	tags=30%, list=17%, signal=25%	12293/16520/12313/11515/75600/14281/16438/224129/232807/12294/12300/18429/12315/16653/207565/14677/329502/210044/19045/54720/12298/14681/18752/12326/215303/18795/18751/12297/19055/12322/26413/18749/16519/12323/12288/16524/54195/16476/19058/12575
mmu01521	EGFR tyrosine kinase inhibitor resistance	65	-0.495288	-1.58904	0.00876218	0.0455778	0.0316562	1542	tags=38%, list=14%, signal=33%	23797/12125/54635/18710/11651/12048/16653/100042150/14184/14183/56637/18752/16452/16451/211323/18751/26413/19211/18803/56484/18708/18596/16193/16001/16194
mmu04911	Insulin secretion	69	-0.489487	-1.57842	0.00882151	0.0455778	0.0316562	2189	tags=43%, list=20%, signal=35%	14672/11936/208647/11512/11516/140492/98660/11515/11931/224129/11928/11909/19339/210044/11932/12424/116838/16531/18752/56508/18795/11517/18751/12322/18749/58802/12323/12288/231991/11911
mmu00910	Nitrogen metabolism	15	-0.72204	-1.73108	0.00906504	0.046137	0.0320445	532	tags=27%, list=5%, signal=25%	14661/80733/12351/14645
mmu03410	Base excision repair	39	0.678285	1.83206	0.00960242	0.0481533	0.033445	1591	tags=36%, list=14%, signal=31%	234258/18973/11546/16881/18971/328417/26430/69263/106344/18974/67967/11545/17193/72151

## Sheet: S7
Table S7. Number of differentially expressed genes (FDR<0.05) in microglia, macrophages and monocytes clusters for each ICH comparison
	Control vs ICH		ICH vs Ch25h-/- ICH		ICH vs 25HC-ICH
Cell type	Up	Down	Up	Down	Up	Down
Homeostatic Mgl	457	249	0	0	0	0
Inflammatory Mgl	503	441	0	1	0	4
Disease-associated Mgl	NA	NA	0	1	0	2
Border-associated Mac	8	13	0	0	0	0
Inflammatory Mac	23	24	1	0	25	28
C1q(lo) Mac	NA	NA	0	0	0	0
Transitioning Mac	NA	NA	0	0	0	0
Monocyte	24	9	0	0	0	0

## Sheet: S8
Table S8. Differentially expressed genes (FDR<0.05) in opposite directions by 25HC and red blood cell phagocytosis in BMDMs.
Down 25HC - Up RBC	Up 25HC - Down RBC
Lcn2	Pacs2
Cav1	B4galt1
S100a8	Cpsf7
Clec4a1	Mrtfa
Scd2	Lrp12
Clec4a2	Zswim8
Gm36161	Ndst1
Gm56768	Polr2a
Isg15	Sntb2
Idi1	Leng8
C3	Dgkd
Irf7	Trpm7
Cfp	Cnot6l
Clec4a3	Dtx3
Col5a3	Gas2l3
Lst1	Plxnc1
Tfrc	Dennd4c
Mmp14	Ogt
Ifit1	Trio
Fos	Mrtfb
Scd1	Tecpr1
Adgre1	Gigyf1
Ehd1	Fnip2
Il18bp	Unk
Cyp51	Zfp704
Sqle	Tmem154
Abca1	Traf6
Tmem176b	Xylt1
AB124611	Lyst
Bst2	Cd300lf
Gpr183	Itpr3
Tmem176a	Rasal3
Nr1h3	Cpeb1
Fdps	Zfp512b
Evl	Vwf
Prxl2b	Stmn1
Msmo1	Atp2a3
Blvrb	Lrrc14b
Gpx1	Ccnb2
Gm62060
Hsd17b7
Tuba1b
Lrrc25
Mrpl52
Banf1
Manf
Kcnn4
Sdf2l1
Ptger4
Pfn1
Junb
Tpm1
Aldh3b1
Tnf
Dhcr24
Hmgcs1
Ftl1-ps1
Gnl1
Tm2d2
Emp3
Ell2
Slc11a1
Bin1
Glul
Ran
Insig1
Lmo4
Tpm4
Xylt2
Marcksl1
Psma3
Txn1
Msr1
Fasn
Dok2
Rnf145
Ms4a6c
Ptges3
Ftl1
Rnf128
Eif5a
Ecm1
Rps2
Calr
Dynll1
Ldlr
Ap1s1
Rab1b
Prdx2
Atp5f1e
Anxa1
Cfl1
Nlrp3
Ybx3
Plod3
Cxcl16
Atox1
Tubb5
Atp5if1
Lyz2
Psma4
Lipa
Igsf8
Lpcat3
Coro1a
Vamp8
Set
Unc93b1
Cope
Tgfb1
Nadk
H2-D1
Twf2
Ppib
Arpc4
Pdia4
Cox8a
Rpn1
Tagln2
Syngr2
Selenof
Clec4d
Arpc1b
Tmbim6
Acp2
Anxa2
Capza2
Ybx1
Tpi1
Surf4
Lgals3bp
Rnpep
Capns1
Calm1
Pitpna
Aldh2
Pdia3
Cct2
B2m
Ncf1
Cyp2s1

## Sheet: S9
Table S9. Gene Ontology Biological Process terms enriched by over-representation analysis of genes downregulated by 25HC and upregulated by red blood cell phagocytosis in BMDMs
ID	Description	GeneRatio	BgRatio	RichFactor	FoldEnrichment	zScore	pvalue	p.adjust	qvalue	geneID	Count
GO:1902653	secondary alcohol biosynthetic process	11/137	62/16779	0.177419	21.7293	14.8364	2.55222928187406e-12	3.06431656566919e-09	2.19202044505118e-09	Idi1/Cyp51/Sqle/Fdps/Msmo1/Hsd17b7/Dhcr24/Hmgcs1/Insig1/Lipa/Lpcat3	11
GO:0033489	cholesterol biosynthetic process via_x000D_ desmosterol	8/137	21/16779	0.380952	46.6569	18.9947	2.9905496737175e-12	3.06431656566919e-09	2.19202044505118e-09	Idi1/Cyp51/Sqle/Fdps/Msmo1/Hsd17b7/Dhcr24/Hmgcs1	8
GO:0036196	zymosterol metabolic process	7/137	16/16779	0.4375	53.5826	19.0921	2.23053317339898e-11	9.79522710718354e-09	7.00689293117365e-09	Idi1/Cyp51/Sqle/Fdps/Msmo1/Hsd17b7/Hmgcs1	7
GO:1902652	secondary alcohol metabolic process	13/137	148/16779	0.0878378	10.7579	10.8182	2.40572723888619e-10	7.39520553233614e-08	5.29006758108763e-08	Idi1/Cyp51/Sqle/Abca1/Fdps/Msmo1/Hsd17b7/Dhcr24/Hmgcs1/Insig1/Ldlr/Lipa/Lpcat3	13
GO:0048002	antigen processing and presentation of_x000D_ peptide antigen	9/137	69/16779	0.130435	15.9749	11.3091	4.63242584526897e-09	1.29455245894153e-06	9.26041874714534e-07	Clec4a1/Clec4a2/Clec4a3/Slc11a1/Calr/Unc93b1/H2-D1/Pdia3/B2m	9
GO:0002250	adaptive immune response	19/137	488/16779	0.0389344	4.76847	7.6653	1.67814239035072e-08	3.22413106746132e-06	2.30634174568595e-06	Clec4a1/Clec4a2/C3/Irf7/Clec4a3/Tfrc/Adgre1/Il18bp/Gpr183/Tnf/Slc11a1/Anxa1/Nlrp3/Unc93b1/Tgfb1/H2-D1/Clec4d/Pdia3/B2m	19
GO:0043254	regulation of protein-containing complex_x000D_ assembly	17/137	436/16779	0.0389908	4.77538	7.24712	9.93272796579973e-08	1.69628920927046e-05	1.21341922342431e-05	Cav1/Isg15/Tfrc/Abca1/Evl/Ptger4/Pfn1/Tpm1/Tnf/Bin1/Lmo4/Cfl1/Nlrp3/Coro1a/Tgfb1/Twf2/Capza2	17
GO:0032496	response to lipopolysaccharide	15/137	355/16779	0.0422535	5.17498	7.21367	2.12829155924691e-07	3.44335171217105e-05	2.46315848602038e-05	Lcn2/S100a8/Fos/Abca1/Nr1h3/Gpx1/Ptger4/Tnf/Slc11a1/Bin1/Prdx2/Nlrp3/Cxcl16/Selenof/B2m	15
GO:0051051	negative regulation of transport	16/137	435/16779	0.0367816	4.50481	6.71981	5.30290139443124e-07	7.40959949385528e-05	5.30036412103677e-05	Cav1/Cyp51/Nr1h3/Ptger4/Tnf/Bin1/Insig1/Txn1/Anxa1/Coro1a/Vamp8/Tgfb1/Tmbim6/Anxa2/Calm1/B2m	16
GO:0055088	lipid homeostasis	10/137	164/16779	0.0609756	7.46795	7.55208	9.54882595267508e-07	0.000127622	9.12928943484588e-05	Cav1/Scd1/Ehd1/Abca1/Nr1h3/Insig1/Ldlr/Lipa/Tgfb1/Surf4	10
GO:0097006	regulation of plasma lipoprotein_x000D_ particle levels	7/137	72/16779	0.0972222	11.9072	8.4151	1.96366391740994e-06	0.000245056	0.000175297	Ehd1/Abca1/Msr1/Ldlr/Lipa/Lpcat3/Anxa2	7
GO:1905954	positive regulation of lipid_x000D_ localization	8/137	103/16779	0.0776699	9.51258	7.86251	1.99297057389203e-06	0.000245056	0.000175297	Cav1/C3/Ehd1/Abca1/Nr1h3/Msr1/Lpcat3/Anxa2	8
GO:0006909	phagocytosis	11/137	225/16779	0.0488889	5.98764	6.8338	2.37890520489356e-06	0.00028126	0.000201196	C3/Cfp/Abca1/Nr1h3/Slc11a1/Msr1/Calr/Ldlr/Anxa1/Coro1a/Tgfb1	11
GO:0050727	regulation of inflammatory response	14/137	378/16779	0.037037	4.53609	6.30902	2.62710805262948e-06	0.000299101	0.000213958	S100a8/C3/Nr1h3/Gpx1/Kcnn4/Ptger4/Tnf/Ldlr/Anxa1/Nlrp3/Lpcat3/Vamp8/Tgfb1/Ncf1	14
GO:0050900	leukocyte migration	14/137	380/16779	0.0368421	4.51222	6.28336	2.79329260625855e-06	0.000306664	0.000219368	S100a8/C3/Mmp14/Gpr183/Kcnn4/Ptger4/Tnf/Ecm1/Calr/Anxa1/Cxcl16/Coro1a/Tgfb1/Ppib	14
GO:0050832	defense response to fungus	6/137	51/16779	0.117647	14.4088	8.7012	3.53516708139763e-06	0.000362032	0.000258975	Clec4a1/Clec4a2/Clec4a3/Tgfb1/Clec4d/Ncf1	6
GO:0009306	protein secretion	14/137	389/16779	0.0359897	4.40782	6.17006	3.66316205942524e-06	0.000362032	0.000258975	Cyp51/Abca1/Nr1h3/Kcnn4/Ptger4/Tnf/Glul/Dynll1/Ap1s1/Anxa1/Nlrp3/Vamp8/Tgfb1/Nadk	14
GO:0006641	triglyceride metabolic process	8/137	112/16779	0.0714286	8.74818	7.46461	3.74788928829682e-06	0.000362032	0.000258975	Cav1/C3/Scd1/Nr1h3/Gpx1/Insig1/Ldlr/Lipa	8
GO:0072593	reactive oxygen species metabolic_x000D_ process	11/137	236/16779	0.0466102	5.70855	6.60943	3.77124109003712e-06	0.000362032	0.000258975	Lcn2/Gpx1/Tnf/Txn1/Eif5a/Prdx2/Atp5if1/Lipa/Tgfb1/Aldh2/Ncf1	11
GO:0035592	establishment of protein localization to_x000D_ extracellular region	14/137	391/16779	0.0358056	4.38527	6.14535	3.88648629575356e-06	0.000362032	0.000258975	Cyp51/Abca1/Nr1h3/Kcnn4/Ptger4/Tnf/Glul/Dynll1/Ap1s1/Anxa1/Nlrp3/Vamp8/Tgfb1/Nadk	14
GO:0071692	protein localization to extracellular_x000D_ region	14/137	394/16779	0.035533	4.35188	6.1086	4.24424422077957e-06	0.000372766	0.000266653	Cyp51/Abca1/Nr1h3/Kcnn4/Ptger4/Tnf/Glul/Dynll1/Ap1s1/Anxa1/Nlrp3/Vamp8/Tgfb1/Nadk	14
GO:0030041	actin filament polymerization	9/137	154/16779	0.0584416	7.1576	6.96496	4.8194252935173e-06	0.000411525	0.00029438	Evl/Pfn1/Tpm1/Bin1/Cfl1/Coro1a/Twf2/Arpc4/Capza2	9
GO:0010876	lipid localization	14/137	409/16779	0.0342298	4.19228	5.93015	6.51108288567706e-06	0.000526712	0.000376777	Cav1/C3/Ehd1/Abca1/Nr1h3/Kcnn4/Msr1/Ldlr/Anxa1/Lipa/Lpcat3/Anxa2/Surf4/Pitpna	14
GO:0030099	myeloid cell differentiation	15/137	473/16779	0.0317125	3.88397	5.77265	7.51900488123964e-06	0.000563742	0.000403266	Isg15/Tfrc/Fos/Gpr183/Blvrb/Junb/Tnf/Glul/Tpm4/Fasn/Atp5if1/Lipa/Tgfb1/Anxa2/B2m	15
GO:1903170	negative regulation of calcium ion_x000D_ transmembrane transport	5/137	35/16779	0.142857	17.4964	8.8638	8.99131161515729e-06	0.000614206	0.000439365	Cav1/Bin1/Tgfb1/Tmbim6/Calm1	5
GO:0001818	negative regulation of cytokine_x000D_ production	12/137	311/16779	0.0385852	4.7257	6.01722	9.36093783109144e-06	0.000624906	0.000447019	Clec4a1/Clec4a2/Clec4a3/Bst2/Banf1/Ptger4/Tnf/Slc11a1/Rnf128/Anxa1/Nlrp3/Tgfb1	12
GO:0042060	wound healing	13/137	366/16779	0.0355191	4.35019	5.87954	9.55451714535698e-06	0.000624906	0.000447019	Cav1/Evl/Gpx1/Lrrc25/Ptger4/Tpm1/Tnf/Slc11a1/Prdx2/Anxa1/Pdia4/Anxa2/Pdia3	13
GO:0019915	lipid storage	7/137	92/16779	0.076087	9.31871	7.25919	1.01982310396411e-05	0.000639783	0.000457661	Cav1/C3/Ehd1/Sqle/Nr1h3/Msr1/Lipa	7
GO:0170062	nutrient storage	7/137	94/16779	0.0744681	9.12044	7.16321	1.17554295498876e-05	0.000707921	0.000506402	Cav1/C3/Ehd1/Sqle/Nr1h3/Msr1/Lipa	7
GO:0030833	regulation of actin filament_x000D_ polymerization	8/137	131/16779	0.0610687	7.47936	6.75482	1.19752374587647e-05	0.000707921	0.000506402	Evl/Pfn1/Tpm1/Bin1/Cfl1/Coro1a/Twf2/Capza2	8
GO:0006457	protein folding	9/137	175/16779	0.0514286	6.29869	6.39306	1.35715683266367e-05	0.000787151	0.000563079	Sdf2l1/Ptges3/Calr/Ppib/Pdia4/Selenof/Pdia3/Cct2/B2m	9
GO:1901654	response to ketone	10/137	225/16779	0.0444444	5.44331	6.08799	1.59982566315308e-05	0.000877161	0.000627466	Cav1/Mmp14/Fos/Nr1h3/Ptger4/Calr/Lipa/Tgfb1/Calm1/Ncf1	10
GO:1990748	cellular detoxification	7/137	99/16779	0.0707071	8.65981	6.9353	1.65282526936776e-05	0.000877161	0.000627466	S100a8/Prxl2b/Gpx1/Slc11a1/Txn1/Prdx2/Aldh2	7
GO:0006631	fatty acid metabolic process	13/137	387/16779	0.0335917	4.11413	5.62346	1.7265783354445e-05	0.000877161	0.000627466	Cav1/Scd2/C3/Scd1/Nr1h3/Prxl2b/Gpx1/Insig1/Fasn/Ptges3/Anxa1/Lipa/Cyp2s1	13
GO:0097242	amyloid-beta clearance	5/137	40/16779	0.125	15.3093	8.22075	1.76376698841637e-05	0.000877161	0.000627466	C3/Cyp51/Tnf/Msr1/Ldlr	5
GO:0002819	regulation of adaptive immune response	10/137	228/16779	0.0438596	5.37169	6.0302	1.79387522885084e-05	0.000877161	0.000627466	C3/Irf7/Tfrc/Tnf/Slc11a1/Anxa1/Nlrp3/Tgfb1/H2-D1/B2m	10
GO:0030301	cholesterol transport	7/137	102/16779	0.0686275	8.40511	6.80613	2.00909087842932e-05	0.00092852	0.000664205	Cav1/Abca1/Nr1h3/Msr1/Ldlr/Lipa/Anxa2	7
GO:0030100	regulation of endocytosis	12/137	336/16779	0.0357143	4.37409	5.66843	2.02377441360698e-05	0.00092852	0.000664205	Cav1/C3/Cfp/Nr1h3/Slc11a1/Bin1/Calr/Vamp8/Tgfb1/Anxa2/Calm1/B2m	12
GO:0002696	positive regulation of leukocyte_x000D_ activation	12/137	350/16779	0.0342857	4.19912	5.48766	3.02223399254199e-05	0.00124419	0.000890016	Cav1/Tfrc/Mmp14/Gpr183/Kcnn4/Tnf/Anxa1/Nlrp3/Coro1a/Tgfb1/Clec4d/B2m	12
GO:0002443	leukocyte mediated immunity	13/137	409/16779	0.0317848	3.89283	5.37388	3.076071195878e-05	0.00124419	0.000890016	C3/Irf7/Tfrc/Bst2/Tnf/Nlrp3/Coro1a/Vamp8/Unc93b1/Tgfb1/H2-D1/B2m/Ncf1	13
GO:0046394	carboxylic acid biosynthetic process	11/137	298/16779	0.0369128	4.52087	5.56409	3.36051800894638e-05	0.00129128	0.0009237	Scd2/Scd1/Nr1h3/Prxl2b/Bin1/Glul/Insig1/Fasn/Ptges3/Anxa1/Plod3	11
GO:0002366	leukocyte activation involved in immune_x000D_ response	11/137	300/16779	0.0366667	4.49073	5.53527	3.57197533113374e-05	0.00134808	0.000964331	Tfrc/Gpr183/Ptger4/Tnf/Slc11a1/Anxa1/Nlrp3/Coro1a/Vamp8/Tgfb1/Clec4d	11
GO:0002697	regulation of immune effector process	13/137	422/16779	0.0308057	3.77291	5.23441	4.24778764552624e-05	0.00151834	0.00108612	C3/Cfp/Tfrc/Bst2/Tnf/Anxa1/Nlrp3/Vamp8/Tgfb1/H2-D1/Tmbim6/B2m/Ncf1	13
GO:0048545	response to steroid hormone	11/137	307/16779	0.0358306	4.38834	5.43638	4.4051103445072e-05	0.00153041	0.00109476	Cav1/Fos/Nr1h3/Junb/Tnf/Ran/Ptges3/Calr/Anxa1/Tgfb1/Calm1	11
GO:0098754	detoxification	7/137	117/16779	0.0598291	7.32753	6.23148	4.87523894526368e-05	0.00162473	0.00116223	S100a8/Prxl2b/Gpx1/Slc11a1/Txn1/Prdx2/Aldh2	7
GO:0007584	response to nutrient	8/137	162/16779	0.0493827	6.04812	5.85785	5.53083498687416e-05	0.0018087	0.00129383	Tfrc/Scd1/Abca1/Gpx1/Fasn/Lipa/Tgfb1/Pdia3	8
GO:0042742	defense response to bacterium	10/137	262/16779	0.0381679	4.6746	5.43904	5.84991091194721e-05	0.00185665	0.00132813	Lcn2/Isg15/Scd1/Tnf/Slc11a1/Nlrp3/Lyz2/Clec4d/B2m/Ncf1	10
GO:0032102	negative regulation of response to_x000D_ external stimulus	12/137	384/16779	0.03125	3.82733	5.08526	7.39152623319153e-05	0.0022276	0.00159349	Isg15/Nr1h3/Gpx1/Banf1/Ptger4/Tnf/Ldlr/Prdx2/Nlrp3/Lpcat3/Tgfb1/Anxa2	12
GO:0045730	respiratory burst	4/137	28/16779	0.142857	17.4964	7.92637	7.47927021364761e-05	0.00223216	0.00159675	Slc11a1/Prdx2/Lipa/Ncf1	4
GO:0032970	regulation of actin filament-based_x000D_ process	12/137	389/16779	0.0308483	3.77813	5.02998	8.35818248179919e-05	0.00238798	0.00170821	Cav1/Bst2/Evl/Ptger4/Pfn1/Tpm1/Bin1/Cfl1/Coro1a/Tgfb1/Twf2/Capza2	12
GO:0006826	iron ion transport	5/137	55/16779	0.0909091	11.134	6.83001	8.45344176376276e-05	0.00238798	0.00170821	Lcn2/Tfrc/Slc11a1/Ftl1/B2m	5
GO:0062197	cellular response to chemical stress	11/137	331/16779	0.0332326	4.07015	5.11852	8.65628229637389e-05	0.00238798	0.00170821	Lcn2/Cav1/Fos/Gpx1/Aldh3b1/Txn1/Prdx2/Anxa1/Cfl1/Nlrp3/Ybx3	11
GO:0051258	protein polymerization	10/137	275/16779	0.0363636	4.45362	5.2393	8.75386271923077e-05	0.00238798	0.00170821	Cav1/Evl/Pfn1/Tpm1/Bin1/Cfl1/Coro1a/Twf2/Arpc4/Capza2	10
GO:1902904	negative regulation of supramolecular_x000D_ fiber organization	8/137	173/16779	0.0462428	5.66356	5.59417	8.77819373761677e-05	0.00238798	0.00170821	Evl/Pfn1/Tpm1/Ldlr/Cfl1/Coro1a/Twf2/Capza2	8
GO:0034976	response to endoplasmic reticulum stress	10/137	278/16779	0.0359712	4.40556	5.19497	9.57494399626204e-05	0.00258188	0.00184691	Cav1/Nr1h3/Manf/Sdf2l1/Rnf145/Calr/Lpcat3/Pdia4/Tmbim6/Pdia3	10
GO:0043242	negative regulation of_x000D_ protein-containing complex disassembly	6/137	91/16779	0.0659341	8.07524	6.14027	0.000100181	0.0026548	0.00189908	Evl/Tpm1/Tnf/Cfl1/Twf2/Capza2	6
GO:0002526	acute inflammatory response	6/137	93/16779	0.0645161	7.90158	6.05538	0.000113046	0.00289585	0.00207151	Lcn2/C3/Tfrc/Tnf/Nlrp3/Lipa	6
GO:0007589	body fluid secretion	6/137	93/16779	0.0645161	7.90158	6.05538	0.000113046	0.00289585	0.00207151	Cav1/Nr1h3/Kcnn4/Ptger4/Vamp8/Anxa2	6
GO:0022600	digestive system process	6/137	93/16779	0.0645161	7.90158	6.05538	0.000113046	0.00289585	0.00207151	Nr1h3/Kcnn4/Ldlr/Lipa/Lpcat3/Vamp8	6
GO:0002679	respiratory burst involved in defense_x000D_ response	3/137	13/16779	0.230769	28.2633	8.92203	0.000143445	0.00348529	0.00249316	Prdx2/Lipa/Ncf1	3
GO:0006690	icosanoid metabolic process	6/137	98/16779	0.0612245	7.49844	5.85381	0.000150998	0.00357052	0.00255413	Prxl2b/Gpx1/Ptges3/Anxa1/Ncf1/Cyp2s1	6
GO:0034341	response to type II interferon	7/137	141/16779	0.0496454	6.08029	5.49636	0.000157978	0.00370706	0.0026518	Bst2/Evl/Tnf/Slc11a1/Cxcl16/Vamp8/Calm1	7
GO:0007586	digestion	6/137	100/16779	0.06	7.34847	5.77712	0.000168739	0.00387092	0.00276901	Nr1h3/Kcnn4/Ldlr/Lipa/Lpcat3/Vamp8	6
GO:0098771	inorganic ion homeostasis	13/137	485/16779	0.0268041	3.28282	4.62867	0.000171749	0.0039108	0.00279754	Lcn2/Cav1/Tfrc/Slc11a1/Glul/Marcksl1/Ftl1/Atox1/Coro1a/Tgfb1/Tmbim6/Calm1/B2m	13
GO:1903706	regulation of hemopoiesis	12/137	423/16779	0.0283688	3.47445	4.67669	0.000183107	0.00407878	0.0029177	Isg15/Mmp14/Fos/Tmem176b/Tmem176a/Tnf/Glul/Prdx2/Anxa1/Nlrp3/Tgfb1/B2m	12
GO:0032376	positive regulation of cholesterol_x000D_ transport	4/137	36/16779	0.111111	13.6083	6.87097	0.000204558	0.00442824	0.00316769	Cav1/Abca1/Nr1h3/Anxa2	4
GO:0046890	regulation of lipid biosynthetic process	8/137	197/16779	0.0406091	4.97358	5.09008	0.000215084	0.00462356	0.00330741	C3/Nr1h3/Fdps/Tnf/Insig1/Ldlr/Anxa1/Lpcat3	8
GO:0097094	craniofacial suture morphogenesis	3/137	15/16779	0.2	24.4949	8.25958	0.000225492	0.00478043	0.00341962	Mmp14/Insig1/Tgfb1	3
GO:0071353	cellular response to interleukin-4	4/137	37/16779	0.108108	13.2405	6.76275	0.000227908	0.00479856	0.00343259	Tuba1b/Fasn/Rps2/Coro1a	4
GO:0050878	regulation of body fluid levels	10/137	311/16779	0.0321543	3.93809	4.74517	0.000238396	0.00495155	0.00354203	Cav1/Nr1h3/Evl/Kcnn4/Ptger4/Prdx2/Vamp8/Pdia4/Anxa2/Pdia3	10
GO:0006879	intracellular iron ion homeostasis	5/137	69/16779	0.0724638	8.87496	5.9472	0.000249256	0.00514237	0.00367853	Lcn2/Tfrc/Slc11a1/Ftl1/B2m	5
GO:0002274	myeloid leukocyte activation	9/137	259/16779	0.034749	4.25587	4.79115	0.000278392	0.00559331	0.0040011	Nr1h3/Kcnn4/Tnf/Slc11a1/Ldlr/Anxa1/Vamp8/Tgfb1/Clec4d	9
GO:0046631	alpha-beta T cell activation	8/137	207/16779	0.0386473	4.73331	4.90365	0.00030072	0.00592572	0.00423889	Clec4a1/Clec4a2/Clec4a3/Gpr183/Ptger4/Anxa1/Nlrp3/Tgfb1	8
GO:0070670	response to interleukin-4	4/137	40/16779	0.1	12.2474	6.4617	0.000309451	0.0060055	0.00429596	Tuba1b/Fasn/Rps2/Coro1a	4
GO:0010038	response to metal ion	10/137	323/16779	0.0309598	3.79178	4.59672	0.000322303	0.00619225	0.00442955	Lcn2/Cav1/Tfrc/Fos/Cyp51/Junb/Slc11a1/Calr/Calm1/B2m	10
GO:0048525	negative regulation of viral process	5/137	76/16779	0.0657895	8.05753	5.59487	0.000391484	0.00712084	0.0050938	Isg15/Ifit1/Bst2/Banf1/Tnf	5
GO:0140962	multicellular organismal-level chemical_x000D_ homeostasis	5/137	76/16779	0.0657895	8.05753	5.59487	0.000391484	0.00712084	0.0050938	Tfrc/Slc11a1/Lipa/Tgfb1/B2m	5
GO:0045927	positive regulation of growth	9/137	272/16779	0.0330882	4.05246	4.60499	0.000398467	0.00712143	0.00509423	C3/Mmp14/Fdps/Ptger4/Cfl1/Ybx3/Cxcl16/Twf2/Ppib	9
GO:0002701	negative regulation of production of_x000D_ molecular mediator of immune response	4/137	43/16779	0.0930233	11.393	6.19121	0.000410036	0.00724397	0.00518188	Bst2/Tnf/Tgfb1/Tmbim6	4
GO:0061041	regulation of wound healing	6/137	118/16779	0.0508475	6.22751	5.17027	0.000413831	0.00726923	0.00519995	Cav1/Ptger4/Tnf/Prdx2/Anxa1/Anxa2	6
GO:0016032	viral process	9/137	274/16779	0.0328467	4.02288	4.57738	0.000420256	0.00734015	0.00525068	Cav1/Isg15/Ifit1/Bst2/Banf1/Pfn1/Tnf/Rab1b/Vamp8	9
GO:0048872	homeostasis of number of cells	11/137	403/16779	0.0272953	3.34298	4.3196	0.000473102	0.00817031	0.00584453	Isg15/Gpr183/Glul/Prdx2/Anxa1/Atp5if1/Lipa/Lpcat3/Coro1a/Tgfb1/B2m	11
GO:0030595	leukocyte chemotaxis	8/137	222/16779	0.036036	4.41349	4.64529	0.000479748	0.00819302	0.00586078	S100a8/C3/Gpr183/Calr/Anxa1/Cxcl16/Coro1a/Ppib	8
GO:0032941	secretion by tissue	4/137	46/16779	0.0869565	10.65	5.94627	0.00053203	0.00893695	0.00639293	Nr1h3/Kcnn4/Ptger4/Vamp8	4
GO:0030003	intracellular monoatomic cation_x000D_ homeostasis	12/137	477/16779	0.0251572	3.08112	4.18373	0.00054263	0.00906546	0.00648487	Lcn2/Cav1/Tfrc/Slc11a1/Marcksl1/Ftl1/Atox1/Coro1a/Tgfb1/Tmbim6/Calm1/B2m	12
GO:0002922	positive regulation of humoral immune_x000D_ response	3/137	20/16779	0.15	18.3712	7.05257	0.00054833	0.00911118	0.00651757	C3/Cfp/Tnf	3
GO:0060348	bone development	8/137	227/16779	0.0352423	4.31628	4.56422	0.000555752	0.00916092	0.00655315	Mmp14/Ptger4/Insig1/Ecm1/Lipa/Tgfb1/Ppib/Anxa2	8
GO:0006979	response to oxidative stress	11/137	411/16779	0.026764	3.27791	4.24215	0.000557284	0.00916092	0.00655315	Lcn2/Mmp14/Fos/Gpx1/Banf1/Aldh3b1/Txn1/Prdx2/Anxa1/Cfl1/Atox1	11
GO:0051494	negative regulation of cytoskeleton_x000D_ organization	7/137	174/16779	0.0402299	4.92713	4.72453	0.000567532	0.00927975	0.00663816	Evl/Pfn1/Tpm1/Cfl1/Coro1a/Twf2/Capza2	7
GO:0070661	leukocyte proliferation	10/137	351/16779	0.02849	3.4893	4.27628	0.00061753	0.0099262	0.00710058	Lst1/Tfrc/Gpr183/Junb/Slc11a1/Prdx2/Anxa1/Lipa/Coro1a/Tgfb1	10
GO:0043542	endothelial cell migration	8/137	231/16779	0.034632	4.24154	4.50103	0.000623336	0.0099262	0.00710058	Lcn2/S100a8/Gpx1/Tnf/Glul/Calr/Anxa1/Tgfb1	8
GO:0002891	positive regulation of immunoglobulin_x000D_ mediated immune response	4/137	48/16779	0.0833333	10.2062	5.79519	0.000626442	0.0099262	0.00710058	C3/Tfrc/Tnf/Tgfb1	4
GO:1905897	regulation of response to endoplasmic_x000D_ reticulum stress	5/137	86/16779	0.0581395	7.12061	5.16302	0.000691495	0.0107356	0.0076796	Cav1/Nr1h3/Manf/Lpcat3/Tmbim6	5
GO:0045785	positive regulation of cell adhesion	12/137	499/16779	0.0240481	2.94528	4.00251	0.000805666	0.0121561	0.00869571	Cav1/Tfrc/Ptger4/Tpm1/Tnf/Calr/Anxa1/Cfl1/Nlrp3/Coro1a/Tgfb1/B2m	12
GO:0010866	regulation of triglyceride biosynthetic_x000D_ process	3/137	23/16779	0.130435	15.9749	6.52035	0.000836716	0.0124254	0.00888838	C3/Nr1h3/Ldlr	3
GO:0031529	ruffle organization	4/137	53/16779	0.0754717	9.24335	5.45348	0.000913519	0.0133088	0.00952029	Cav1/Evl/Pfn1/Tpm1	4
GO:0006907	pinocytosis	3/137	24/16779	0.125	15.3093	6.36472	0.00095056	0.0137184	0.00981329	Cav1/Nr1h3/Kcnn4	3
GO:0009410	response to xenobiotic stimulus	10/137	372/16779	0.0268817	3.29232	4.05658	0.000962912	0.0138317	0.00989436	Lcn2/Tfrc/Fos/Abca1/Gpx1/Calr/Lipa/Tgfb1/Aldh2/Cyp2s1	10
GO:0046651	lymphocyte proliferation	9/137	309/16779	0.0291262	3.56722	4.13259	0.000991018	0.0141037	0.0100889	Lst1/Tfrc/Gpr183/Slc11a1/Prdx2/Anxa1/Lipa/Coro1a/Tgfb1	9
GO:2000146	negative regulation of cell motility	9/137	315/16779	0.0285714	3.49927	4.06283	0.00113354	0.015767	0.0112788	Cav1/Bst2/Evl/Ptger4/Tpm1/Tnf/Calr/Cfl1/Tgfb1	9
GO:0048144	fibroblast proliferation	6/137	144/16779	0.0416667	5.1031	4.48652	0.00117784	0.0162362	0.0116144	Cav1/Gpx1/Kcnn4/Ptges3/Tgfb1/Anxa2	6
GO:0003158	endothelium development	6/137	145/16779	0.0413793	5.06791	4.46359	0.00122057	0.016487	0.0117938	Lcn2/Gpx1/Tnf/Fasn/Plod3/Lipa	6
GO:0050673	epithelial cell proliferation	11/137	454/16779	0.0242291	2.96744	3.85595	0.00125412	0.0168348	0.0120425	Cav1/Mmp14/Gpx1/Tnf/Glul/Ecm1/Atp5if1/Lipa/Tgfb1/B2m/Ncf1	11
GO:0046164	alcohol catabolic process	3/137	27/16779	0.111111	13.6083	5.94883	0.00134936	0.0174283	0.0124671	Aldh3b1/Tpi1/Aldh2	3
GO:0065005	protein-lipid complex assembly	3/137	27/16779	0.111111	13.6083	5.94883	0.00134936	0.0174283	0.0124671	Abca1/Bin1/Lpcat3	3
GO:0002027	regulation of heart rate	5/137	100/16779	0.05	6.12372	4.6626	0.001365	0.0175565	0.0125588	Cav1/Tpm1/Tnf/Bin1/Calm1	5
GO:2000377	regulation of reactive oxygen species_x000D_ metabolic process	6/137	149/16779	0.0402685	4.93186	4.37394	0.0014035	0.0178307	0.012755	Lcn2/Tnf/Eif5a/Prdx2/Tgfb1/Aldh2	6
GO:0002532	production of molecular mediator_x000D_ involved in inflammatory response	5/137	101/16779	0.049505	6.06309	4.63055	0.00142681	0.0180494	0.0129114	Tnf/Prdx2/Lipa/Vamp8/Ncf1	5
GO:0034755	iron ion transmembrane transport	3/137	28/16779	0.107143	13.1223	5.82465	0.00150231	0.0186968	0.0133745	Lcn2/Tfrc/Slc11a1	3
GO:0098901	regulation of cardiac muscle cell action_x000D_ potential	3/137	28/16779	0.107143	13.1223	5.82465	0.00150231	0.0186968	0.0133745	Cav1/Bin1/Calm1	3
GO:0040013	negative regulation of locomotion	9/137	330/16779	0.0272727	3.34021	3.89556	0.00156353	0.0192251	0.0137525	Cav1/Bst2/Evl/Ptger4/Tpm1/Tnf/Calr/Cfl1/Tgfb1	9
GO:0006024	glycosaminoglycan biosynthetic process	3/137	29/16779	0.103448	12.6698	5.70665	0.00166571	0.0200799	0.0143639	Ptger4/Xylt2/Tgfb1	3
GO:1900027	regulation of ruffle assembly	3/137	29/16779	0.103448	12.6698	5.70665	0.00166571	0.0200799	0.0143639	Cav1/Evl/Pfn1	3
GO:0007159	leukocyte cell-cell adhesion	10/137	401/16779	0.0249377	3.05423	3.77761	0.00168676	0.0202306	0.0144717	Cav1/S100a8/Tfrc/Tnf/Prdx2/Anxa1/Nlrp3/Coro1a/Tgfb1/B2m	10
GO:1904951	positive regulation of establishment of_x000D_ protein localization	9/137	334/16779	0.0269461	3.30021	3.85258	0.00169795	0.0202306	0.0144717	Kcnn4/Ptger4/Tnf/Glul/Ran/Dynll1/Vamp8/Tgfb1/Nadk	9
GO:0000302	response to reactive oxygen species	7/137	211/16779	0.0331754	4.06313	4.06256	0.00174427	0.0207023	0.0148091	Lcn2/Fos/Gpx1/Txn1/Prdx2/Anxa1/Cfl1	7
GO:1903829	positive regulation of protein_x000D_ localization	11/137	474/16779	0.0232068	2.84223	3.69149	0.00176495	0.0208672	0.0149271	Tfrc/Kcnn4/Ptger4/Tnf/Glul/Ran/Dynll1/Cfl1/Vamp8/Tgfb1/Nadk	11
GO:0071216	cellular response to biotic stimulus	8/137	273/16779	0.029304	3.58899	3.91308	0.00181853	0.0212966	0.0152343	Lcn2/Abca1/Nr1h3/Tnf/Prdx2/Nlrp3/Cxcl16/B2m	8
GO:0060586	multicellular organismal-level iron ion_x000D_ homeostasis	3/137	30/16779	0.1	12.2474	5.59433	0.0018398	0.0212966	0.0152343	Tfrc/Slc11a1/B2m	3
GO:0071404	cellular response to low-density_x000D_ lipoprotein particle stimulus	3/137	30/16779	0.1	12.2474	5.59433	0.0018398	0.0212966	0.0152343	Hmgcs1/Ldlr/Tgfb1	3
GO:0034612	response to tumor necrosis factor	7/137	214/16779	0.0327103	4.00617	4.01562	0.00188981	0.0213735	0.0152893	Lcn2/Fos/Tnf/Eif5a/Cfl1/Ybx3/Cxcl16	7
GO:0036314	response to sterol	3/137	31/16779	0.0967742	11.8524	5.48721	0.00202484	0.0223898	0.0160162	Abca1/Insig1/Tgfb1	3
GO:0030324	lung development	7/137	217/16779	0.0322581	3.95079	3.96953	0.00204461	0.0224484	0.0160582	Mmp14/Tnf/Ptges3/Plod3/Lipa/Tgfb1/Anxa2	7
GO:0008015	blood circulation	11/137	483/16779	0.0227743	2.78927	3.62024	0.00204475	0.0224484	0.0160582	Cav1/Gpx1/Manf/Kcnn4/Tpm1/Tnf/Bin1/Plod3/Tgfb1/Rnpep/Calm1	11
GO:0006611	protein export from nucleus	4/137	66/16779	0.0606061	7.42269	4.7434	0.00207207	0.0226674	0.0162148	Ran/Txn1/Calr/Tgfb1	4
GO:0010721	negative regulation of cell development	8/137	281/16779	0.0284698	3.48682	3.81425	0.00217693	0.0236463	0.0169151	Tmem176b/Tmem176a/Ldlr/Prdx2/Anxa1/Cfl1/Tgfb1/B2m	8
GO:0002790	peptide secretion	8/137	282/16779	0.0283688	3.47445	3.80215	0.00222539	0.0236707	0.0169325	S100a8/Abca1/Ptger4/Tnf/Glul/Dynll1/Anxa1/Nadk	8
GO:0097553	calcium ion transmembrane import into_x000D_ cytosol	6/137	164/16779	0.0365854	4.48077	4.0642	0.00228133	0.0240165	0.0171799	Cav1/Kcnn4/Coro1a/Tgfb1/Tmbim6/Calm1	6
GO:0002828	regulation of type 2 immune response	3/137	33/16779	0.0909091	11.134	5.28703	0.00242868	0.0248032	0.0177427	Ecm1/Anxa1/Nlrp3	3
GO:0050764	regulation of phagocytosis	5/137	115/16779	0.0434783	5.32498	4.22251	0.00252499	0.0254486	0.0182043	C3/Cfp/Slc11a1/Calr/Tgfb1	5
GO:0010594	regulation of endothelial cell migration	6/137	168/16779	0.0357143	4.37409	3.98787	0.00257322	0.0257658	0.0184312	Lcn2/Tnf/Glul/Calr/Anxa1/Tgfb1	6
GO:0001906	cell killing	7/137	227/16779	0.030837	3.77675	3.82165	0.00263253	0.0260889	0.0186624	C3/Lyz2/Coro1a/Tgfb1/H2-D1/B2m/Ncf1	7
GO:0002440	production of molecular mediator of_x000D_ immune response	7/137	228/16779	0.0307018	3.76018	3.80733	0.0026978	0.0264953	0.0189531	Tfrc/Bst2/Tnf/Nlrp3/Tgfb1/Tmbim6/B2m	7
GO:0062012	regulation of small molecule metabolic_x000D_ process	9/137	358/16779	0.0251397	3.07897	3.60759	0.00271205	0.0265504	0.0189925	Cav1/Nr1h3/Fdps/Tnf/Insig1/Ldlr/Anxa1/Atp5if1/Lpcat3	9
GO:0071248	cellular response to metal ion	6/137	170/16779	0.0352941	4.32263	3.95059	0.00272929	0.0266344	0.0190526	Tfrc/Fos/Junb/Slc11a1/Calr/B2m	6
GO:0051402	neuron apoptotic process	9/137	359/16779	0.0250696	3.07039	3.59783	0.0027629	0.0268771	0.0192262	Lcn2/Gpx1/Tnf/Ptges3/Prdx2/Coro1a/Set/Tgfb1/Tmbim6	9
GO:0030162	regulation of proteolysis	9/137	360/16779	0.025	3.06186	3.5881	0.00281451	0.0271531	0.0194237	Cav1/Mmp14/Nr1h3/Gpx1/Tnf/Ecm1/Cfl1/Atp5if1/Anxa2	9
GO:0051047	positive regulation of secretion	9/137	360/16779	0.025	3.06186	3.5881	0.00281451	0.0271531	0.0194237	S100a8/Kcnn4/Ptger4/Glul/Dynll1/Vamp8/Tgfb1/Nadk/Anxa2	9
GO:0001885	endothelial cell development	4/137	72/16779	0.0555556	6.80414	4.47798	0.0028486	0.0271531	0.0194237	Gpx1/Tnf/Fasn/Plod3	4
GO:0034616	response to laminar fluid shear stress	2/137	10/16779	0.2	24.4949	6.74291	0.00285311	0.0271531	0.0194237	Abca1/Tgfb1	2
GO:0051284	positive regulation of sequestering of_x000D_ calcium ion	2/137	10/16779	0.2	24.4949	6.74291	0.00285311	0.0271531	0.0194237	Tgfb1/Calm1	2
GO:0045454	cell redox homeostasis	3/137	35/16779	0.0857143	10.4978	5.10335	0.00287902	0.0272311	0.0194794	Gpx1/Txn1/Prdx2	3
GO:0097191	extrinsic apoptotic signaling pathway	7/137	233/16779	0.0300429	3.67949	3.7369	0.00304299	0.0283459	0.0202769	Lcn2/Cav1/Gpx1/Tnf/Prdx2/Tgfb1/Pdia3	7
GO:0002685	regulation of leukocyte migration	7/137	234/16779	0.0299145	3.66377	3.72304	0.00311591	0.0288213	0.020617	Mmp14/Ptger4/Ecm1/Calr/Anxa1/Coro1a/Tgfb1	7
GO:0070266	necroptotic process	3/137	36/16779	0.0833333	10.2062	5.01699	0.00312215	0.0288213	0.020617	Cav1/Tnf/Ybx3	3
GO:1901655	cellular response to ketone	5/137	121/16779	0.0413223	5.06093	4.06756	0.00314611	0.0288231	0.0206183	Mmp14/Fos/Ptger4/Tgfb1/Ncf1	5
GO:0007596	blood coagulation	6/137	175/16779	0.0342857	4.19912	3.85986	0.00315048	0.0288231	0.0206183	Cav1/Evl/Prdx2/Pdia4/Anxa2/Pdia3	6
GO:0002367	cytokine production involved in immune_x000D_ response	5/137	122/16779	0.0409836	5.01944	4.04273	0.00325944	0.0296134	0.0211836	Bst2/Tnf/Nlrp3/Tgfb1/B2m	5
GO:0050870	positive regulation of T cell activation	7/137	236/16779	0.029661	3.63272	3.69556	0.00326576	0.0296134	0.0211836	Cav1/Tfrc/Anxa1/Nlrp3/Coro1a/Tgfb1/B2m	7
GO:0032535	regulation of cellular component size	9/137	369/16779	0.0243902	2.98718	3.50206	0.00331419	0.0299138	0.0213984	Evl/Kcnn4/Pfn1/Tpm1/Bin1/Cfl1/Coro1a/Twf2/Capza2	9
GO:0050817	coagulation	6/137	178/16779	0.0337079	4.12835	3.80703	0.00342545	0.0304636	0.0217917	Cav1/Evl/Prdx2/Pdia4/Anxa2/Pdia3	6
GO:0042692	muscle cell differentiation	10/137	443/16779	0.0225734	2.76466	3.41521	0.00346231	0.0304636	0.0217917	Mmp14/Ehd1/Fdps/Gpx1/Tpm1/Bin1/Eif5a/Calr/Tgfb1/Ybx1	10
GO:0051149	positive regulation of muscle cell_x000D_ differentiation	4/137	76/16779	0.0526316	6.44602	4.31734	0.00346455	0.0304636	0.0217917	Mmp14/Fdps/Eif5a/Tgfb1	4
GO:0032741	positive regulation of interleukin-18_x000D_ production	2/137	11/16779	0.181818	22.2681	6.40194	0.00346852	0.0304636	0.0217917	Tnf/Nlrp3	2
GO:0036151	phosphatidylcholine acyl-chain_x000D_ remodeling	2/137	11/16779	0.181818	22.2681	6.40194	0.00346852	0.0304636	0.0217917	Nr1h3/Lpcat3	2
GO:0001659	temperature homeostasis	6/137	181/16779	0.0331492	4.05993	3.75535	0.00371793	0.0321037	0.022965	Lcn2/Cav1/Scd1/Nr1h3/Gpx1/Tnf	6
GO:0002221	pattern recognition receptor signaling_x000D_ pathway	8/137	309/16779	0.02589	3.17086	3.49455	0.00388734	0.0330624	0.0236508	Cav1/S100a8/Irf7/Nr1h3/Banf1/Tnf/Nlrp3/Unc93b1	8
GO:0071402	cellular response to lipoprotein_x000D_ particle stimulus	3/137	39/16779	0.0769231	9.42111	4.77696	0.00392576	0.0330624	0.0236508	Hmgcs1/Ldlr/Tgfb1	3
GO:0042157	lipoprotein metabolic process	4/137	79/16779	0.0506329	6.20124	4.20426	0.00398194	0.0334439	0.0239237	Abca1/Glul/Ldlr/Lipa	4
GO:0051607	defense response to virus	8/137	311/16779	0.0257235	3.15047	3.47313	0.00404074	0.0338453	0.0242108	Isg15/Irf7/Ifit1/Bst2/Tnf/Nlrp3/Vamp8/Unc93b1	8
GO:0033572	transferrin transport	2/137	12/16779	0.166667	20.4124	6.10337	0.00414003	0.0343958	0.0246046	Tfrc/B2m	2
GO:0061771	response to caloric restriction	2/137	12/16779	0.166667	20.4124	6.10337	0.00414003	0.0343958	0.0246046	Fasn/Ldlr	2
GO:0098911	regulation of ventricular cardiac muscle_x000D_ cell action potential	2/137	12/16779	0.166667	20.4124	6.10337	0.00414003	0.0343958	0.0246046	Cav1/Bin1	2
GO:0060541	respiratory system development	7/137	248/16779	0.0282258	3.45694	3.5367	0.0042838	0.035304	0.0252543	Mmp14/Tnf/Ptges3/Plod3/Lipa/Tgfb1/Anxa2	7
GO:0006164	purine nucleotide biosynthetic process	6/137	189/16779	0.031746	3.88808	3.6228	0.0045885	0.037315	0.0266928	Ptger4/Atp5f1e/Atp5if1/Lipa/Tgfb1/Nadk	6
GO:0002758	innate immune response-activating_x000D_ signaling pathway	8/137	318/16779	0.0251572	3.08112	3.39946	0.00461476	0.0374295	0.0267747	Cav1/S100a8/Irf7/Nr1h3/Banf1/Tnf/Nlrp3/Unc93b1	8
GO:0051495	positive regulation of cytoskeleton_x000D_ organization	6/137	190/16779	0.0315789	3.86761	3.60674	0.00470704	0.0377782	0.0270242	Cav1/Evl/Pfn1/Tpm1/Bin1/Cfl1	6
GO:0002793	positive regulation of peptide secretion	5/137	133/16779	0.037594	4.6043	3.78634	0.00470747	0.0377782	0.0270242	S100a8/Ptger4/Glul/Dynll1/Nadk	5
GO:0032640	tumor necrosis factor production	6/137	191/16779	0.0314136	3.84737	3.59079	0.00482782	0.0377782	0.0270242	Clec4a1/Clec4a2/Clec4a3/Kcnn4/Ptger4/Tgfb1	6
GO:0071356	cellular response to tumor necrosis_x000D_ factor	6/137	191/16779	0.0314136	3.84737	3.59079	0.00482782	0.0377782	0.0270242	Lcn2/Fos/Tnf/Eif5a/Cfl1/Ybx3	6
GO:0035094	response to nicotine	3/137	42/16779	0.0714286	8.74818	4.56155	0.00484444	0.0377782	0.0270242	Gpx1/Tnf/B2m	3
GO:0097178	ruffle assembly	3/137	42/16779	0.0714286	8.74818	4.56155	0.00484444	0.0377782	0.0270242	Cav1/Evl/Pfn1	3
GO:0036295	cellular response to increased oxygen_x000D_ levels	2/137	13/16779	0.153846	18.8422	5.83893	0.00486668	0.0377782	0.0270242	Lcn2/Cav1	2
GO:0046185	aldehyde catabolic process	2/137	13/16779	0.153846	18.8422	5.83893	0.00486668	0.0377782	0.0270242	Aldh3b1/Aldh2	2
GO:1903332	regulation of protein folding	2/137	13/16779	0.153846	18.8422	5.83893	0.00486668	0.0377782	0.0270242	Pdia4/Pdia3	2
GO:1990314	cellular response to insulin-like growth_x000D_ factor stimulus	2/137	13/16779	0.153846	18.8422	5.83893	0.00486668	0.0377782	0.0270242	Cfl1/Tgfb1	2
GO:0048639	positive regulation of developmental_x000D_ growth	6/137	192/16779	0.03125	3.82733	3.57495	0.00495087	0.0382387	0.0273535	C3/Fdps/Ptger4/Ybx3/Twf2/Ppib	6
GO:2001242	regulation of intrinsic apoptotic_x000D_ signaling pathway	6/137	192/16779	0.03125	3.82733	3.57495	0.00495087	0.0382387	0.0273535	Cav1/S100a8/Gpx1/Eif5a/Ybx3/Tmbim6	6
GO:0016064	immunoglobulin mediated immune response	5/137	136/16779	0.0367647	4.50274	3.72125	0.00517086	0.0393915	0.0281782	C3/Irf7/Tfrc/Tnf/Tgfb1	5
GO:0001937	negative regulation of endothelial cell_x000D_ proliferation	3/137	43/16779	0.0697674	8.54473	4.49448	0.00517703	0.0393915	0.0281782	Cav1/Tnf/Atp5if1	3
GO:0042092	type 2 immune response	3/137	43/16779	0.0697674	8.54473	4.49448	0.00517703	0.0393915	0.0281782	Ecm1/Anxa1/Nlrp3	3
GO:0008360	regulation of cell shape	5/137	137/16779	0.0364964	4.46987	3.69997	0.00533226	0.0401871	0.0287473	Lst1/Tpm1/Anxa1/Cfl1/Coro1a	5
GO:0045862	positive regulation of proteolysis	6/137	195/16779	0.0307692	3.76844	3.52806	0.00533387	0.0401871	0.0287473	Cav1/Mmp14/Tnf/Cfl1/Atp5if1/Anxa2	6
GO:0014812	muscle cell migration	5/137	138/16779	0.0362319	4.43748	3.6789	0.0054972	0.0406925	0.0291089	Cav1/Kcnn4/Ptger4/Tpm1/Anxa1	5
GO:0031338	regulation of vesicle fusion	3/137	44/16779	0.0681818	8.35053	4.42955	0.00552304	0.0406925	0.0291089	Anxa1/Coro1a/Anxa2	3
GO:0031638	zymogen activation	3/137	44/16779	0.0681818	8.35053	4.42955	0.00552304	0.0406925	0.0291089	Mmp14/Dhcr24/Anxa2	3
GO:0015850	organic hydroxy compound transport	7/137	261/16779	0.0268199	3.28476	3.37527	0.00564057	0.0406925	0.0291089	Cav1/Abca1/Nr1h3/Msr1/Ldlr/Lipa/Anxa2	7
GO:0001765	membrane raft assembly	2/137	14/16779	0.142857	17.4964	5.60245	0.00564755	0.0406925	0.0291089	Cav1/Anxa2	2
GO:0006957	complement activation, alternative_x000D_ pathway	2/137	14/16779	0.142857	17.4964	5.60245	0.00564755	0.0406925	0.0291089	C3/Cfp	2
GO:0006968	cellular defense response	2/137	14/16779	0.142857	17.4964	5.60245	0.00564755	0.0406925	0.0291089	B2m/Ncf1	2
GO:0030157	pancreatic juice secretion	2/137	14/16779	0.142857	17.4964	5.60245	0.00564755	0.0406925	0.0291089	Nr1h3/Vamp8	2
GO:0045628	regulation of T-helper 2 cell_x000D_ differentiation	2/137	14/16779	0.142857	17.4964	5.60245	0.00564755	0.0406925	0.0291089	Anxa1/Nlrp3	2
GO:0086064	cell communication by electrical_x000D_ coupling involved in cardiac conduction	2/137	14/16779	0.142857	17.4964	5.60245	0.00564755	0.0406925	0.0291089	Cav1/Calm1	2
GO:1905664	regulation of calcium ion import across_x000D_ plasma membrane	2/137	14/16779	0.142857	17.4964	5.60245	0.00564755	0.0406925	0.0291089	Cav1/Kcnn4	2
GO:0002695	negative regulation of leukocyte_x000D_ activation	6/137	199/16779	0.0301508	3.6927	3.46696	0.0058778	0.0417625	0.0298743	Lst1/Nr1h3/Ldlr/Prdx2/Anxa1/Tgfb1	6
GO:0072524	pyridine-containing compound metabolic_x000D_ process	6/137	199/16779	0.0301508	3.6927	3.46696	0.0058778	0.0417625	0.0298743	Bin1/Ran/Lipa/Nadk/Tpi1/Ncf1	6
GO:0097028	dendritic cell differentiation	3/137	45/16779	0.0666667	8.16496	4.36665	0.00588262	0.0417625	0.0298743	Tmem176b/Tmem176a/Tgfb1	3
GO:0090398	cellular senescence	4/137	90/16779	0.0444444	5.44331	3.83478	0.0063223	0.0443716	0.0317407	Cav1/Calr/Ybx1/B2m	4
GO:0010649	regulation of cell communication by_x000D_ electrical coupling	2/137	15/16779	0.133333	16.3299	5.3892	0.00648171	0.0448756	0.0321012	Cav1/Calm1	2
GO:2000343	positive regulation of chemokine (C-X-C_x000D_ motif) ligand 2 production	2/137	15/16779	0.133333	16.3299	5.3892	0.00648171	0.0448756	0.0321012	Tnf/Tgfb1	2
GO:0001101	response to acid chemical	5/137	146/16779	0.0342466	4.19433	3.51721	0.0069488	0.0476799	0.0341073	Lcn2/Lrrc25/Tnf/Cfl1/Tmbim6	5
GO:0071214	cellular response to abiotic stimulus	8/137	344/16779	0.0232558	2.84824	3.14254	0.00731172	0.0492165	0.0352064	Lcn2/Cav1/Ptger4/Tnf/Calr/Nlrp3/Ybx3/Tgfb1	8
GO:0010744	positive regulation of macrophage_x000D_ derived foam cell differentiation	2/137	16/16779	0.125	15.3093	5.19554	0.00736826	0.0492165	0.0352064	Tnf/Msr1	2
GO:0042159	lipoprotein catabolic process	2/137	16/16779	0.125	15.3093	5.19554	0.00736826	0.0492165	0.0352064	Ldlr/Lipa	2
GO:0006935	chemotaxis	9/137	418/16779	0.0215311	2.63701	3.07512	0.00738088	0.0492165	0.0352064	S100a8/C3/Gpr183/Calr/Anxa1/Cxcl16/Coro1a/Tgfb1/Ppib	9
GO:0071825	protein-lipid complex organization	3/137	49/16779	0.0612245	7.49844	4.1332	0.00745936	0.0494183	0.0353507	Abca1/Bin1/Lpcat3	3
GO:1990090	cellular response to nerve growth factor_x000D_ stimulus	3/137	49/16779	0.0612245	7.49844	4.1332	0.00745936	0.0494183	0.0353507	Lcn2/Ehd1/Coro1a	3
GO:0042886	amide transport	8/137	346/16779	0.0231214	2.83178	3.12378	0.00755997	0.0496944	0.0355483	S100a8/Abca1/Ptger4/Tnf/Glul/Dynll1/Anxa1/Nadk	8

[truncated: 4 more sheets: S10, S11, S12, S13]
